1           **The nonstructural protein 5 of coronaviruses antagonizes**  
2           **GSDMD-mediated pyroptosis by cleaving and inactivating its**  
3           **pore-forming p30 fragment**

4           Fushan Shi<sup>1,2,3,4,&</sup>, Qian Lv<sup>1,&</sup>, Tingjun Wang<sup>1</sup>, Jidong Xu<sup>1</sup>, Wei Xu<sup>1,4</sup>, Yuhua Shi<sup>1</sup>, Xinyu Fu<sup>1</sup>,  
5           Tianming Yang<sup>1</sup>, Yang Yang<sup>5</sup>, Lenan Zhuang<sup>1</sup>, Weihuan Fang<sup>1,3</sup>, Jinyan Gu<sup>2,\*</sup>, Xiaoliang Li<sup>1,2,3,6,7,\*</sup>

6           <sup>1</sup>Department of Veterinary Medicine, College of Animal Sciences, Zhejiang University, Hangzhou  
7           310058, Zhejiang, China.

8           <sup>2</sup>MOA Key Laboratory of Animal Virology, Center for Veterinary Sciences, Zhejiang University,  
9           Hangzhou 310058, Zhejiang, China.

10          <sup>3</sup>Institute of Preventive Veterinary Medicine, Zhejiang Provincial Key Laboratory of Preventive  
11          Veterinary Medicine, Zhejiang University, Hangzhou 310058, Zhejiang, China.

12          <sup>4</sup>Veterinary Teaching Hospital, Center for Veterinary Sciences, Zhejiang University, Hangzhou  
13          310058, Zhejiang, China.

14          <sup>5</sup>Key Laboratory of Applied Technology on Green-Eco-Healthy Animal Husbandry of Zhejiang  
15          Province, Zhejiang Provincial Engineering Laboratory for Animal Health Inspection & Internet  
16          Technology, College of Animal Science and Technology & College of Veterinary Medicine of  
17          Zhejiang A&F University, Hangzhou 311300, Zhejiang, China.

18          <sup>6</sup>Hainan Institute of Zhejiang University, Sanya 572025, Hainan, China.

19          <sup>7</sup>Lead contact

20          & These authors contributed equally to this work.

21          \* Corresponding author: Dr. Jinyan Gu, E-mail: [gujinyan@zju.edu.cn](mailto:gujinyan@zju.edu.cn); Dr. Xiaoliang Li, E-mail:  
22          [xlli@zju.edu.cn](mailto:xlli@zju.edu.cn)

## 23 **Abstract**

24 Coronaviruses (CoV) are a family of RNA viruses that typically cause respiratory, enteric and  
25 hepatic diseases in animals and humans. Here, we used porcine epidemic diarrhea virus (PEDV)  
26 as a model of coronaviruses (CoVs) to illustrate the reciprocal regulation between CoVs infection  
27 and pyroptosis. For the first time, we clarified the molecular mechanism of porcine Gasdermin D  
28 (pGSDMD)-mediated pyroptosis and demonstrated that amino acids T239 and F240 within  
29 pGSDMD-p30 are critical for pyroptosis. Furthermore, 3C-like protease Nsp5 from SARS-CoV-2,  
30 MERS-CoV, PDCoV and PEDV can cleave human/porcine GSDMD at the Q193-G194 junction  
31 upstream of the caspase-1 cleavage site to produce two fragments which fail to trigger pyroptosis  
32 or inhibit viral replication. Thus, we provide clear evidence that coronaviruses may utilize viral  
33 Nsp5-GSDMD pathway to help their host cells escaping from pyroptosis, protecting the  
34 replication of the virus during the initial period, which suggest an important strategy for  
35 coronaviruses infection and sustain.

36 **Keywords:** Coronaviruses; GSDMD; Pyroptosis; Nsp5

## 37 **Introduction**

38 Coronaviruses (CoVs) are enveloped positive single-strand RNA viruses which belong to the  
39 family of *Coronaviridae*. These viruses can cause enteric, respiratory or hepatic diseases in both  
40 human and other mammals<sup>1</sup>. According to serological and genotypic characterizations, CoVs are  
41 divided into four genera, including *Alphacoronavirus* ( $\alpha$ -CoV), *Betacoronavirus* ( $\beta$ -CoV),  
42 *Gammacoronavirus* ( $\gamma$ -CoV) and *Deltacoronavirus* ( $\delta$ -CoV)<sup>2,3</sup>. As a member of the  
43 *Alphacoronavirus* genus, porcine epidemic diarrhea virus (PEDV) was first identified in Europe in  
44 1971 which characterized by severe diarrhea, dehydration, vomiting and high mortality in suckling  
45 piglets<sup>4</sup>. A highly virulent PEDV reemerged in China in 2010 and spread rapidly in the USA in  
46 2013, causing enormous economic losses to the global pig farming industry<sup>5-7</sup>. The viral genome  
47 of PEDV is approximately 28 kb and encodes an accessory protein, two polyproteins and 4  
48 structural proteins. Most of synthesized polyproteins are cleaved by nonstructural protein 5 (Nsp5),  
49 a 3C-like protease encoded by ORF1a, and the protease activity of Nsp5 is essential for PEDV's  
50 replication. Nsp5 from different CoVs share highly conserved amino acid sequence which makes  
51 Nsp5 as an ideal broad-spectrum antiviral target<sup>8,9</sup>. It has been reported that 3C-like protease of

52 different viruses, including foot-and-mouth disease (FMDV), hepatitis A virus (HAV) and  
53 enterovirus 71 (EV71), can antagonize innate immune signaling pathways by disrupting one or  
54 more components of the IFN-inducing pathways<sup>10-14</sup>. For coronaviruses, PEDV Nsp5 antagonizes  
55 type I IFN signaling by cleaving the nuclear transcription factor kappa B essential modulator  
56 (NEMO) at Q231<sup>15</sup>. Porcine deltacoronavirus (PDCoV) Nsp5 cleaves the porcine  
57 mRNA-decapping enzyme 1a (pDCP1A) at Q343 to facilitate its replication<sup>16</sup>. A recently  
58 published study demonstrates that SARS-CoV-2 Nsp5 can cleave TAB1 and NLRP12 at two  
59 distinct cleavage sites<sup>17</sup>. Although many studies have demonstrated the immune evasion strategies  
60 of coronaviruses, the molecular mechanism between coronaviruses replication and the innate  
61 immune response remains poorly understood.

62 Pyroptosis is a form of programmed cell death which characterized by cell swelling, pore  
63 formation in the plasma, lysis and releases of cytoplasmic contents<sup>18,19</sup>. This type of inflammatory  
64 cell death functions as an innate immune effector to antagonize pathogenic microorganisms.  
65 Recent studies identified Gasdermin D (GSDMD) as an executioner of pyroptosis, which is  
66 cleaved and activated by caspase-1 and caspase-4/5/11<sup>18-20</sup>. Upon caspase-1/4/5/11 cleavage, the  
67 N-terminus of GSDMD (GSDMD-p30) can bind to lipids and phosphatidylethanolamine to form  
68 pores at 10-20 nm in size and drive to pyroptosis<sup>21-23</sup>. Under the condition of pathogen infection,  
69 the pyroptosis helps the host eliminating infected cells and thereby restricts proliferation of  
70 intracellular pathogens<sup>24-26</sup>. On the other hand, the 3C-like protease of EV71 virus can facilitate its  
71 replication by inhibiting pyroptosis through further cleaving the active GSDMD-p30<sup>27</sup>. However,  
72 the relationship between coronaviruses infection and GSDMD-mediated pyroptosis has not been  
73 fully illustrated.

74 In this study, we used PEDV as a model of CoVs to investigate the relationship between CoVs  
75 infection and pyroptosis. We found that the pGSDMD-mediated pyroptosis protected host cells  
76 against PEDV infection. However, during the early stage of infection, Nsp5 of PEDV directly  
77 cleaved pGSDMD at the Q193-G194 junction and produced two inactive fragments, which do not  
78 inhibit PEDV replication. Furthermore, we found Nsp5 from other coronaviruses, such as PDCoV,  
79 SARS-CoV-2 and MERS-CoV, had activity to cleave both hGSDMD and pGSDMD to inhibit  
80 GSDMD-mediated pyroptosis. Therefore, these results demonstrated a previously unknown  
81 mechanism of coronaviruses to escape from the pyroptosis of innate immune responses.

## 82 **Results**

83 **PEDV infection induces the degradation of pGSDMD.** Since GSDMD was reported as a key  
84 effector for pyroptosis, many studies had been performed on human and murine GSDMD, but  
85 studies focusing on pGSDMD and its function against pathogenic infection were rare. To  
86 investigate the role of pGSDMD on pathogenic infection, the amino acid sequence of pGSDMD  
87 was predicted and aligned with other GSDMD homologs from human and mouse (Extended Data  
88 Fig. 1), and polyclonal antibody against pGSDMD was prepared as previously described  
89 (Extended Data Fig. 2)<sup>28,29</sup>.

90 To determine whether PEDV infection targets pGSDMD, IPEC-J2 cells were infected with  
91 PEDV at indicated time points. Cell death was evaluated by LDH release. The results showed that  
92 pyroptosis was inhibited at early timepoints post infection (Fig. 1A). Furthermore, PEDV  
93 infection induced degradation of pGSDMD in IPEC-J2 cells (Fig. 1B). Similar results were  
94 observed in Vero cells transfected with plasmid encoding pGSDMD and infected with PEDV (Fig.  
95 1C and D). In addition, the degradation of pGSDMD induced by PEDV infection increased in an  
96 MOI-dependent manner in IPEC-J2 and Vero cells (Fig. 1E and F). These results indicate that  
97 pyroptosis and pGSDMD expression are both inhibited by PEDV infection in IPEC-J2 cells and  
98 Vero cells.

99

100 **Caspase-1 cleaves pGSDMD at residue D279-G280 and induces pyroptosis.** We next  
101 investigate whether pGSDMD could induce pyroptosis. Therefore, porcine caspase-1 (pCaspase-1)  
102 and pGSDMD gene were amplified and cloned into vectors to construct recombinant plasmids and  
103 then the plasmids were co-transfected into HEK293T cells. As shown in Fig. 2A, co-transfected  
104 with plasmids encoding pCaspase-1 and pGSDMD significantly increased the LDH release in  
105 HEK293T cells (Fig. 2A). To further confirm the results, the cells were collected and stained with  
106 PI, and then analyzed with Fluorescence microscopy and Flow cytometry (Extended Data Fig. 3A  
107 and B). Both results showed that co-transfection with plasmids encoding pCaspase-1 and  
108 pGSDMD led to increased cell death. These results indicate that co-expression of pGSDMD and  
109 pCaspase-1 could induce pyroptosis in HEK293T cells.

110 The cells were also collected to detect pCaspase-1 mediated cleavage of pGSDMD by Western

111 blotting. As shown in Fig. 2B, cell lysates co-transfected with HA-caspase-1 and  
112 p3×Flag-N-GSDMD-FL had a faster-migrating protein band (about 35 kDa) and cell lysates  
113 co-transfected with HA-caspase-1 and p3×Flag-C-GSDMD-FL had a smaller protein band (about  
114 25 kDa). These results show that pCaspase-1 could cleave pGSDMD to generate an N-terminal  
115 (about 30 kDa) and a C-terminal (about 20 kDa).

116 Based on the sizes of the cleaved protein bands and the cleavage site preference of caspase-1,  
117 the D254-G255 and D279-G280 pairs were tested as the potential cleaved sites for pCaspase-1.  
118 Hence, we constructed two mutants in which D was replaced with A. As shown in Fig. 2C and D,  
119 wild-type pGSDMD, the D254A mutant and the D279A mutant were co-transfected with  
120 pCaspase-1, followed by LDH release assays and PI staining assays. Both results showed that  
121 mutation of D279 resulted in significantly decreased pyroptosis, while mutant of D254 showed no  
122 significant change, which suggested pCaspase-1 cleaved pGSDMD at residue D279-G280. The  
123 Western blotting analysis of the cell lysates was consistent with this result (Fig. 2E), in which the  
124 wild-type pGSDMD and the D254A mutant were cleaved by pCaspase-1 and the D279A mutant  
125 was resistant to the cleavage. The results indicate that pCaspase-1 cleaves pGSDMD at residue  
126 D279-G280 and generated an N-terminal (GSDMD<sub>1-279</sub>) which could induce pyroptosis (Fig. 2F).

127 To further validate the results, plasmids encoding pGSDMD<sub>1-279</sub> was constructed and  
128 transfected into HEK293T cells. The LDH release assays showed that pGSDMD<sub>1-279</sub> individually  
129 induced pyroptosis (Fig. 2G). Thus, the above results suggest that pGSDMD is cleaved by  
130 pCaspase-1 at residue D279-G280 and then generate an N-terminal (p30) which could induce  
131 pyroptosis and a C-terminal (p20) (Fig. 2H).

132

133 **L295/Y378/A382 are the key sites for pGSDMD autoinhibition.** It has been reported that the  
134 residues C38/C39 and C191/C192 (human/murine) are essential for oligomerization of  
135 GSDMD-N terminal<sup>21,30</sup>. Hence, we next examined whether these key sites also existed on  
136 pGSDMD. Based on the multiple-sequence alignment of pGSDMD, hGSDMD and murine  
137 GSDMD (mGSDMD) (Extended Data Fig. 1), residues C38 and S191 were tested as the potential  
138 key sites for pGSDMD to oligomerize and they were replaced with A to construct point mutants.  
139 HEK293T cells were transfected with these point mutants, LDH release results showed that C38A  
140 and S191A did not show inhibitory effects on pyroptosis (Fig 3A). However, we further evaluated

141 the oligomerization of pGSDMD-p30 following treatment of NSC and NSA (two specific  
142 inhibitors for oligomerization of hGSDMD-p30)<sup>30,31</sup>. As shown in Fig. 3B, the results showed that  
143 both NSC and NSA inhibited the pyroptosis induced by porcine/human GSDMD-p30 (Fig. 3B),  
144 suggesting that there are residues which impact the oligomerization of pGSDMD-p30 and still  
145 required further exploration in the future.

146 Earlier reports have demonstrated that full length of hGSDMD and mGSDMD have an  
147 autoinhibitory structure, in which GSDMD-C terminal inhibits the activity of GSDMD-N terminal  
148 to induce pyroptosis<sup>23,30</sup>. Based on the multiple-sequence alignment, L295, Y378 and A382 of  
149 pGSDMD formed a pocket which associated with GSDMD-N terminal according to the homology  
150 modeling results (Fig. 3C). Thus, the three residues were tested as the potential sites in pGSDMD.  
151 These residues were separately mutated into D  
152 (GSDMD-FL-L295D/GSDMD-FL-Y378D/GSDMD-FL-A382D), L295 and Y373 were  
153 simultaneously mutated into D (GSDMD-FL-2D), and three residues were simultaneously  
154 mutated into D (GSDMD-FL-3D). The mutants were transfected into HEK293T cells, and results  
155 showed that all of the mutants had the activity to induce pyroptosis (Fig. 3D). However, there  
156 were no statistic differences between 2D and 3D (Fig. 3E). The aforementioned results suggest  
157 that L295, Y378 and A382 are the critical sites for autoinhibitory structure of full length of  
158 pGSDMD.

159

160 **PEDV Nsp5 associates with and cleaves pGSDMD.** To investigate the relationship between  
161 PEDV infection and pyroptosis, Vero cells were transfected with plasmids encoding pGSDMD  
162 full-length (pGSDMD-FL) and GSDMD N-terminal (pGSDMD-p30) and then infected with  
163 PEDV. The LDH release assays results showed that PEDV infection had an inhibition effect on  
164 pyroptosis induced by pGSDMD-p30 (Fig. 4A). Meanwhile, the replication of PEDV was also  
165 inhibited significantly by pyroptosis induced by pGSDMD-p30 (Fig. 4B). These results suggest  
166 that there might be reciprocal regulation between PEDV and the pGSDMD-p30-mediated  
167 pyroptosis.

168 Nonstructural protein 5 (Nsp5), the 3C-like protease, which mediates the cleavage of viral  
169 polyproteins, has reported be able to cleave a number of host proteins, such as DCP1A and NEMO,  
170 to suppress antiviral host responses<sup>10,11,15,16</sup>. Therefore, we speculated that PEDV Nsp5 can cleave

171 pGSDMD to suppress pyroptosis. As shown in Fig. 4C, HEK293T cells were transfected with  
172 PEDV Nsp5 or pGSDMD-p30, or co-transfected with these two recombinant plasmids. The  
173 supernatants were collected at different time points and tested for LDH release. The results  
174 showed that the expression of PEDV Nsp5 inhibited pyroptosis induced by pGSDMD-p30 (Fig.  
175 4C). For further validation, HEK293T cells were transfected with plasmids as indicated in Fig. 4D,  
176 and the Western blotting results showed that there was a faster-migrating protein band (about 25  
177 kDa) in samples co-transfected with PEDV Nsp5 and p3×Flag-N-GSDMD-FL (Fig. 4D, lane 6),  
178 and there were two cleavage protein bands, of 35 kDa (p30) and 25 kDa respectively, in samples  
179 co-transfected with HA-caspase-1, PEDV Nsp5 and p3×Flag-N-GSDMD-FL (Fig. 4D, lane 7).  
180 These results implied that pGSDMD was a target cleaved by PEDV Nsp5. To further confirm the  
181 pGSDMD cleavage mediated by PEDV Nsp5, p3×Flag-N-GSDMD-FL was co-transfected with an  
182 increasing dose of PEDV Nsp5 into HEK293T cells. Western blotting results showed that  
183 pGSDMD cleavage progressively increased in a PEDV Nsp5-dose-dependent manner (Fig. 4E).  
184 We next investigated the colocalization of pGSDMD and PEDV Nsp5 with confocal microscopy.  
185 As shown in Fig. 4F, HEK293T cells were transfected with plasmids as shown and the protein  
186 localization were examined after 24 h. An indirect immunofluorescence assay showed that  
187 pGSDMD and Nsp5 colocalized in the cytoplasm (Fig. 4F). The CoIP experiments also  
188 demonstrated that PEDV Nsp5 interacted with and cleaved pGSDMD (Fig. 4G).

189 To further investigate whether PEDV Nsp5 cleaves pGSDMD by means of its protease activity,  
190 two Nsp5 mutants, H41A and C144A, which disrupted the protease activity of Nsp5<sup>8,32-34</sup>, were  
191 constructed and co-transfected with p3×Flag-N-GSDMD-FL into HEK293T cells. As shown in  
192 Fig. 4G, wild-type Nsp5 cleaved pGSDMD successfully, while the two mutants failed to cleave  
193 pGSDMD (Fig. 4H). Nevertheless, CoIP experiments showed that the loss of protease activity of  
194 Nsp5 did not impact its interaction with pGSDMD (Fig. 4I). Hence, the protease activity of PEDV  
195 Nsp5 is essential for pGSDMD cleavage but not interaction.

196

197 **PEDV Nsp5 cleaves pGSDMD at residue Q193-G194.** We next examined the sequence of  
198 pGSDMD for potential PEDV Nsp5 cleavage site. Logo analysis of the cleavage site predicted  
199 from the polyprotein cleavage of PEDV Nsp5 was shown in Fig. 5A. Based on the substrate  
200 preference of Nsp5 and the sizes of the cleaved bands, the Q193-G194, Q195-G196 and

201 Q197-G198 pairs were tested as the potential cleaved sites<sup>35,36</sup>. Therefore, these three Q residues  
202 were replaced with A and these three mutants pGSDMD-Q193A, pGSDMD-Q195A,  
203 pGSDMD-Q197A were co-transfected with vector or PEDV Nsp5. As shown in Fig. 5B, Western  
204 blotting results showed that pGSDMD-Q193A was resistant to PEDV Nsp5-mediated cleavage,  
205 while pGSDMD-Q195A and pGSDMD-Q197A were not (Fig. 5B), suggesting that PEDV Nsp5  
206 cleaves pGSDMD at residue Q193-G194 junction (Fig. 5C).

207 PEDV Nsp5 cleaves pGSDMD to generate pGSDMD<sub>1-193</sub> and pGSDMD<sub>194-488</sub>, and pCaspase-1  
208 cleaves pGSDMD at residue D279. Thus, we next investigated whether these cleaved fragments of  
209 pGSDMD<sub>1-193</sub>, pGSDMD<sub>194-279</sub> and pGSDMD<sub>194-488</sub> can induce pyroptosis. As shown in Fig. 5D,  
210 these three truncated mutants were separately transfected into HEK293T cells and results showed  
211 that none of them induced pyroptosis (Fig. 5D). Meanwhile, since the protein band of  
212 pGSDMD<sub>194-279</sub> was too small to be visualized, we subsequently cloned them into EGFP-tagged  
213 vectors and then transfected them into HEK293T cells. The results further confirmed that these  
214 three truncated mutants cannot induce pyroptosis (Extended Data Fig. 4). Next, we further  
215 examined whether pCaspase-1 could associate with and cleave these three truncated mutants. As  
216 shown in Fig. 5E and F, HEK293T cells were co-transfected with plasmids as indicated, and the  
217 results of CoIP assay and Western blotting assays showed that pCaspase-1 could associate with  
218 and cleave full-length of pGSDMD, but had no interaction with pGSDMD<sub>1-193</sub>, pGSDMD<sub>194-279</sub>  
219 and pGSDMD<sub>194-488</sub>.

220 As described in the preceding text, pyroptosis of cells induced by pGSDMD-p30 had an  
221 inhibition effect on PEDV replication. Therefore, we next investigated whether PEDV  
222 Nsp5-mediated cleavage of pGSDMD impacts its antiviral activity. Vero cells were transfected  
223 with plasmids encoding vector, pGSDMD-FL, pGSDMD-p30, pGSDMD<sub>1-193</sub>, pGSDMD<sub>194-279</sub> and  
224 pGSDMD<sub>194-488</sub>. At 24 h after transfection, cells were infected with PEDV at an MOI of 0.5 for  
225 another 24 h, and then total RNA was extracted and the viral RNA level of PEDV were evaluated  
226 by quantitative real-time PCR. As shown in Fig. 5G, there was no statistical differences among  
227 vector, pGSDMD-FL, pGSDMD<sub>1-193</sub>, pGSDMD<sub>194-279</sub> and pGSDMD<sub>194-488</sub>, indicating that the  
228 antiviral activity of fragments cleaved by Nsp5 were nearly abolished (Fig. 5G). In summary, the  
229 above results demonstrate that the antiviral activity of pyroptosis induced by pGSDMD-p30 are  
230 impaired by PEDV Nsp5-mediated cleavage, which emphasizes the importance of pGSDMD



231 cleavage on PEDV replication.

232

233 **Amino acids T239 and F240 are two key sites for pGSDMD-p30 to induce pyroptosis.** It has  
234 been shown that pGSDMD<sub>1-279</sub> (pGSDMD-p30) can induce pyroptosis, while pGSDMD<sub>1-193</sub>  
235 cannot. Based on this, we conjectured that the active motif of pGSDMD to induce pyroptosis  
236 located at the amino acids between 193 and 279. Thus, we constructed a series of pGSDMD  
237 truncated mutants which encoding pGSDMD<sub>1-254</sub>, pGSDMD<sub>1-244</sub>, pGSDMD<sub>1-234</sub>, pGSDMD<sub>1-224</sub>,  
238 and pGSDMD<sub>1-214</sub>, and transfected them into HEK293T cells. As shown in Figure 6A and B,  
239 pGSDMD<sub>1-279</sub> (pGSDMD-p30), pGSDMD<sub>1-254</sub> and pGSDMD<sub>1-244</sub> can induce pyroptosis, while  
240 pGSDMD<sub>1-234</sub>, pGSDMD<sub>1-224</sub>, pGSDMD<sub>1-214</sub> cannot (Fig. 6A and B), indicating that the key sites  
241 located between amino acids 234 and 244. Hence, the amino acids between 234 and 244 were  
242 replaced by D and these point mutants were transfected into HEK293T cells as shown in Fig. 6C.  
243 The results showed that all of the point mutants, except T239D and F240D (Fig. 6C), can induce  
244 pyroptosis, suggesting that T239 and F240 are the essential sites for pGSDMD-p30 to induce  
245 pyroptosis. The results were further proved by PI staining assay (Extended Data Fig. 5). Notably,  
246 the point mutant R238D can inhibit the release of LDH but cannot inhibit the intake of PI,  
247 suggesting that the mutation of R238 led to smaller pores on cell membrane than wild type  
248 pGSDMD-p30.

249 To further investigate the effects of T239D and F240D on viral replication, the two mutants  
250 were transfected into Vero cells along with vector, pGSDMD-FL and pGSDMD-p30, and 24 h  
251 after transfection, cells were infected with PEDV at an MOI of 0.5 and then the replication of  
252 virus were tested by quantitative real-time PCR. As presented in Fig. 6D, in contrast to  
253 pGSDMD-p30, neither T239D nor F240D could inhibit the replication of PEDV (Fig. 6D), further  
254 confirming that inhibition of pyroptosis induced by pGSDMD-p30 is essential for PEDV to  
255 replicate.

256

257 **GSDMD is a common substrate of different coronaviruses Nsp5.** Next, we tested whether  
258 Nsp5 encoded by other genera of CoVs can cleave GSDMD. Multiple-sequence alignment  
259 showed that Nsp5 of PDCoV, SARS-CoV-2 and MERS-CoV were highly similar to PEDV Nsp5  
260 (Extended Data Fig. 6), especially their catalytic domain (Fig. 7A). Thus, the Nsp5 of PDCoV,

261 SARS-CoV-2 and MERS-CoV were cloned into empty vector and co-transfected with pGSDMD,  
262 and the Western blotting results showed that all these Nsp5 can cleave pGSDMD (Fig. 7B). To  
263 further confirm the results, we respectively constructed point mutants of these Nsp5 which did not  
264 show protease activity. As shown in Fig. 7C, PDCoV Nsp5 can cleave pGSDMD while its mutants  
265 cannot (Fig. 7C). Likewise, the wild-type Nsp5 of SARS-CoV-2 cleaved both pGSDMD (Fig. 7D)  
266 and hGSDMD (Fig. 7E), while its mutants did not. Similar results were observed for cleavage of  
267 pGSDMD and hGSDMD by MERS-CoV Nsp5 (Fig. 7F and G). The results above suggest that  
268 GSDMD is a common substrate of different genera of coronaviruses Nsp5. To further validate this  
269 conclusion, we analyzed the peptides GAVSLQ(193)↓GQGQGH (pGSDMD, arrow represents  
270 cleavage site) and Nsp5 of PEDV (Fig. 8A), SARS-CoV-2 (Fig. 8B), MERS-CoV (Fig. 8C) and  
271 PDCoV (Fig. 8D), peptides GATCLQ(193)↓GEGQGH (hGSDMD, arrow represents cleavage site)  
272 and Nsp5 of SARS-CoV-2 (Fig. 8E) and MERS-CoV (Fig. 8F) by homology modeling<sup>37,38</sup>. As  
273 shown in Fig. 8, the residues of both pGSDMD and hGSDMD comfortably fit in the Nsp5 pockets  
274 of different CoVs, suggesting a strong interaction between them.

275

## 276 **Discussion**

277 Although considerable progress has been made in CoVs research, knowledge gaps still exist with  
278 respect to the host innate immune responses against CoVs infection. Here, we used PEDV as a  
279 model of CoVs to illustrate the relationship between CoVs infection and pyroptosis (Fig. 9). We  
280 demonstrated that the pGSDMD plays a protective role against PEDV infection. At early time  
281 points after PEDV infection, pGSDMD was cleaved by Nsp5 to produce two inactive fragments  
282 which failed to trigger pyroptosis and inhibited PEDV replication. The pGSDMD-p30 could  
283 inhibit PEDV replication, and the amino acids T239 and F240 determined its inhibitory effect.  
284 Furthermore, Nsp5 of other genera can also cleave hGSDMD and pGSDMD to produce inactive  
285 fragments. Thus, our results demonstrated that GSDMD may be an appealing target for the design  
286 of anti-coronavirus therapies.

287 Recent studies have identified that human/murine GSDMD is a direct substrate of  
288 caspase-1/4/5/11 and serves as the executioner for pyroptosis. However, the amino acids sequence  
289 and molecular characterization of pGSDMD have not been illustrated. In order to investigate the

290 role of pGSDMD-mediated pyroptosis in PEDV infection, we first clarified the molecular  
291 characterization of pGSDMD. Porcine GSDMD has 488 aa and can be cleaved by porcine  
292 caspase-1 at D279 to produce GSDMD-NT (p30, 1-279 aa), which lead to pyroptosis.  
293 Site-directed mutagenesis studies revealed that C38/C39 and C191/C192 (human/murine)  
294 mutations impaired hGSDMD-p30/mGSDMD-p30 oligomerization, which is critical for  
295 hGSDMD-p30/mGSDMD-p30 during pore formation<sup>22,30</sup>. However, our results indicated that  
296 mutation of porcine C38 or S191 (corresponding to human C38 and C191) had no effect on  
297 p30-induced pyroptosis. Interestingly, inhibitors of hGSDMD-p30 oligomerization could also  
298 abrogate pGSDMD-p30-induced pyroptosis. The results suggest that other critical site(s)  
299 determine(s) pGSDMD-p30 oligomerization. Furthermore, our results demonstrated that T239 and  
300 F240 within pGSDMD-p30 are critical for inducing pyroptosis.

301 Generally, the 3C-like protease of CoVs is critical for viral replication by cleaving polyprotein  
302 precursors to produce mature nonstructural proteins. However, the 3C-like protease has also  
303 acquired mechanisms to evade host innate immune responses. It is reported that CoVs Nsp5 can  
304 antagonize innate immune signaling pathways by disrupting one or more components of the  
305 IFN-inducing pathways<sup>10-12</sup>. Our present study first demonstrated that CoVs Nsp5 can subvert  
306 innate immune responses by cleaving and inactivating GSDMD. Thus, GSDMD represents a  
307 novel target of CoVs Nsp5. PEDV Nsp5 not only interacted with and cleaved full length of  
308 pGSDMD, but also abrogated pGSDMD-p30-induced pyroptosis by cleaving the p30 fragment.  
309 Conversely, protease-dead mutants of the four CoVs Nsp5 were unable to cleave human/porcine  
310 GSDMD. Thus, these results suggest a reciprocal regulation between CoVs Nsp5 and pyroptosis.

311 It is noteworthy that CoVs Nsp5 cleaves human/porcine GSDMD at the Q193-G194 junction.  
312 Our results suggest that amino acids T239 and F240 within pGSDMD-p30 are critical for  
313 pyroptosis. These two sites within pGSDMD-p30 determine CoVs replication. Upon cleavage by  
314 CoVs Nsp5, the truncated N-terminal fragment without T239 and F240 sites failed to induce  
315 pyroptosis or inhibit viral replication. Interestingly, a newly published study demonstrated that  
316 Zika virus (ZIKV) protease directly cleaved the hGSDMD into N-terminal fragment (1-249),  
317 which contains T239 and F240. ZIKV NS2B3 protease cleaves hGSDMD at residue R249 to  
318 produce hGSDMD<sub>1-249</sub> fragment, which lead to pyroptosis in a caspase-independent manner<sup>39</sup>.  
319 Consistent with this, a previous study demonstrated that NS5 protein of ZIKA could directly

320 interact with NLRP3 protein and facilitate NLRP3 inflammasome activation<sup>40</sup>, which is an  
321 upstream event for hGSDMD-p30-mediated pyroptosis. Therefore, viruses use different strategies  
322 to evade host immune responses and facilitate its replication.

323 In summary, we used PEDV as a model of coronaviruses to illustrate the reciprocal regulation  
324 between CoVs infection and pyroptosis. For the first time, we clarified the molecular mechanism  
325 of pGSDMD-mediated pyroptosis and demonstrated that amino acids T239 and F240 within  
326 pGSDMD-p30 are critical for pyroptosis. Furthermore, 3C-like protease Nsp5 from SARS-CoV-2,  
327 MERS-CoV, PDCoV and PEDV can cleave human/porcine GSDMD at the Q193-G194 junction  
328 upstream of the caspase-1 cleavage site to produce two fragments which fail to trigger pyroptosis  
329 or inhibit viral replication. Thus, we provide clear evidence that the coronaviruses might utilize its  
330 Nsp5 to escape the host pyroptotic cell death in favor of its replication during the initial period, an  
331 important strategy for their sustaining infections. Further work is needed to investigate the role of  
332 GSDMD in viral pathogenesis.

333

## 334 **Methods**

335 **Plasmids and antibodies.** The pGSDMD gene was amplified from cDNA of IPEC-J2 cells by  
336 PCR and then cloned into p3×Flag-CMV-7.1 vector, p3×Flag-CMV-14 vector and pEGFP-C1  
337 vector, respectively. Nsp5 of PEDV was amplified from cDNA of PEDV and cloned into  
338 PRK5-MYC vector. The truncation mutants and point mutants were generated by PCR of the  
339 corresponding plasmids. All of the plasmids were constructed by homologous recombination using  
340 ClonExpress II One Step Cloning Kit (Vazyme, C112), and all of the point mutants were  
341 constructed using Mut Express II Fast Mutagenesis Kit V2 (Vazyme, C214) and DpnI  
342 endonuclease (NEB, R0176S). Primers used for plasmids construction were listed in  
343 Supplementary table 1 and table 2. All plasmids were verified by sequencing.

344 Anti-Flag antibody (F1804), anti-MYC antibody (C3956) and anti-GSDMD antibody (G7422)  
345 were purchased from Sigma. Anti-HA antibody (3724) was purchased from Cell Signaling  
346 Technology. Anti-β-actin antibody (A01010) was purchased from Abbkine. Anti-GSDMDC1  
347 antibody (sc-393581) was purchased from Santa Cruz. The anti-PEDV N monoclonal antibody  
348 and the anti-GSDMD polyclonal antibody were prepared in our laboratory as previously

349 described<sup>28,29</sup>. Necrosulfonamide (S8251) and Disulfiram (S1680) were purchased from Selleck.

350

351 **Cells and virus.** African green monkey kidney cells (Vero cells) and Human embryonic kidney  
352 293T cells (HEK293T) were cultured in DMEM (Hyclone, SH30243.01) containing 10% fetal  
353 bovine serum (FBS) (Corille, C1015-05) and 5% Penicillin-Streptomycin Solution (Hyclone,  
354 SV30010). IPEC-J2 cells were maintained in DMEM/F12 (Hyclone, SH30023.01) supplemented  
355 with 10% FBS and 5% Penicillin-Streptomycin Solution. Cells were incubated at 37°C with 5%  
356 CO<sub>2</sub>. When cells seeded in cell culture plates grown to approximately 60%, they were transfected  
357 with plasmids using VigoFect (Vigorous Biotechnology, T001) or Lipo8000 Transfection Reagent  
358 (Beyotime, C0533) according to the manufacturer's instructions.

359 The PEDV strain ZJ15XS0101 (GenBank accession KX550281) was isolated and stored in our  
360 laboratory<sup>41</sup>. Vero cells and IPEC-J2 cells grown to approximately 80%-90% in cell culture plates  
361 were infected with PEDV at different dose with 4 µg/mL trypsin.

362

363 **Cytotoxicity assays.** Cell death were measured using CytoTox 96 Non-Radioactive Cytotoxicity  
364 Assay kit (Promega, G1780) according to the lactate dehydrogenase (LDH) released into medium.

365

366 **Western blotting.** Cells were lysed with RIPA Lysis Buffer (Beyotime, P0013B) containing  
367 PMSF (Beyotime, ST506) for 10 min at 4°C and then denatured in 5 × SDS-PAGE loading buffer  
368 (Solarbio, P1040) for 10 min. After harvest, the cell lysate of equal amount was loaded on 8%-12%  
369 SDS-PAGE gels (Fdbio science) and electrophoresed, and then transferred to polyvinylidene  
370 difluoride membranes (BIO-RAD, 1620177). The membranes were blocked with QuickBlock  
371 Blocking Buffer for Western blotting (Beyotime, P0252) for 1 h and then incubated with primary  
372 antibodies diluted with QuickBlock Primary Antibody Dilution Buffer for Western blotting  
373 (Beyotime, P0256) at 4°C overnight. Membranes were washed with TBST for 10 min (3 times) and  
374 then incubated with secondary antibodies diluted in TBST for 1h at room temperature. After  
375 washed 3 times with TBST (10 min each), the chemiluminescent signals were analyzed with Clix  
376 imaging system (Clix Science Instruments).

377

378

379 **Propidium iodide assays.** HEK293T cells were seeded in 24-well plates and transfected with  
380 indicated plasmids for 24 h. After that, the medium was collected for cytotoxicity assays. The cells  
381 were washed for 3 times gently and stained with propidium iodide (BD Bioscience, 556463) and  
382 then analyzed with fluorescence microscopy.

383

384 **Flow cytometry assays.** Cells were harvested using trypsin and washed with PBS 3 times gently  
385 and then stained with propidium iodide (BD Bioscience, 556547) according to the manufacturer's  
386 instructions. The cells were analyzed with Flow cytometer (Becton Dickinson, FACSVerse).

387

388 **RNA extraction and RT-qPCR.** To collect the RNA of PEDV, the medium was discarded and  
389 total RNA of the cells and virus was extracted with RNA-easy Isolation Reagent (Vazyme,  
390 R701-01). After measuring the concentration of extracted RNA, reverse transcription was  
391 conducted with HiScript III 1st Strand cDNA Synthesis Kit (+gDNA wiper) (Vazyme, P312-02)  
392 according to the manufacturer's instructions. Afterwards, cDNA samples were analyzed by qPCR  
393 using ChamQ Universal SYBR qPCR Master Mix (Vazyme, P711-01). Primers used for RT-qPCR  
394 were listed in Supplementary table 3.

395

396 **CoIP assay.** HEK293T cells seeded in 6-well plates were transfected with the specific plasmids  
397 for 24 h and then cells were lysed with Cell lysis buffer for Western and IP (Beyotime, P0013)  
398 containing PMSF (Beyotime, ST506) or Protease inhibitor cocktail for general use (Beyotime,  
399 P1005) for 30 min on the ice. Afterwards, the lysates were centrifuged at 4 °C and the supernatants  
400 were incubated with anti-Flag binding beads (Sigma, M8823) at 4 °C overnight. The binding beads  
401 were then washed with TBS 5 times and then denatured in 1 × SDS-PAGE loading buffer for 10  
402 min. Finally, the supernatants were analyzed with Western blotting.

403

404 **Confocal immunofluorescence assay.** HEK293T cells were seeded in 24-well plates on  
405 coverslips and after cultured overnight indicated plasmids were transfected. At 24 h after  
406 transfection, cells were washed 3 times with cold PBS and then fixed with Immunol Staining Fix  
407 Solution (Beyotime, P0098) at room temperature for 30 min, following with washing 3 times with  
408 PBS (2 min each). Then the cells were permeabilized with Immunostaining Permeabilization

409 Solution with Saponin (Beyotime, P0095) at room temperature for 20 min and washed with PBS 3  
410 times (5 min each). After that, cells were blocked with QuickBlock Blocking Buffer for Immunol  
411 Staining (Beyotime, P0260) at room temperature for 60 min, and then incubated with primary  
412 antibody (anti-MYC, Sigma, C3956) at 4 °C overnight. After washing 3 times with PBS (3 min  
413 each), the cells were incubated with the secondary antibody (Goat Anti-Rabbit IgG Alexa Fluor  
414 568, Abcam, ab175471) at 37 °C for 60 min in the dark and then they were washed 3 times with  
415 PBS (5 min each). Nuclei were stained with DAPI (Beyotime, C1002) for 5 min and then cells  
416 were washed 4 times with PBS (5 min each). The cells were then analyzed with a Laser confocal  
417 microscopy (Olympus, IX81-FV1000).

418

419 **Sequence alignment.** We collected amino acid sequence of pGSDMD and other GSDMD  
420 homologs from human (GenBank accession NP\_001159709.1) and mouse (GenBank accession  
421 6N9N\_A), and the amino acid sequence of Nsp5 of PEDV and Nsp5 of PDCoV (GenBank  
422 accession AKQ63081.1), SARS-CoV-2 (GenBank accession NC\_045512) and MERS-CoV  
423 (GenBank accession NC\_038294). SnapGene software were used to perform the  
424 multiple-sequence alignment.

425

426 **Statistical analysis.** All experiments were repeated three times or more. Data are presented as  
427 mean  $\pm$  SD and analyzed by the two-tailed Student's *t* test or one-way ANOVA followed by  
428 Tukey's multiple comparisons test by Prism software (GraphPad). The differences were  
429 considered significant when  $p < 0.05$  (\*),  $p < 0.01$  (\*\*), and  $p < 0.001$  (\*\*\*) .

430

### 431 **Acknowledgements**

432 This work was financially supported by grants from the National Natural Science Foundation of  
433 China (32072817), the National Key Research & Development Program of China  
434 (2016YFD0500102), the Zhejiang Provincial Key R&D Program of China (2021C02049), the  
435 Scientific Research Fund of Zhejiang Provincial Education Department (Y202045613), the  
436 Zhejiang Provincial Natural Science Foundation of China (LY18C180001, LY21C180001) , and  
437 the Fundamental Research Funds for the Central Universities of China (2020XZZX002-20).

438 We thank Dr. Ying Shan in the Shared Experimental Platform for Core Instruments, College of  
439 Animal Sciences, Zhejiang University for assistance with analysis of laser confocal microscopy  
440 imaging.

441

## 442 **Author contributions**

443 F. Shi, W. Fang, X. Li and Q. Lv conceived the overall scope of the project. F. Shi and Q. Lv  
444 designed and performed the majority of the experiments. J. Gu and T. Wang performed the viral  
445 culture and the preparation of polyclonal antibodies; J. X helped with quantitative real-time PCR;  
446 W. Xu assisted Q. Lv in Flow cytometry; Y. Shi, X. Fu and T. Yang assisted Q. Lv in plasmid  
447 construction and confocal immunofluorescence assay; Y. Yang helped with statistical analysis; L.  
448 Zhuang assisted F. Shi and Q. Lv wrote the manuscript. All authors discussed the results and  
449 reviewed the manuscript.

450

## 451 **Competing interests**

452 The authors declare no competing interests.

453

## 454 **References**

- 455 1 Zhang, Q. & Yoo, D. Immune evasion of porcine enteric coronaviruses and viral modulation  
456 of antiviral innate signaling. *Virus Res* **226**, 128-141, doi:10.1016/j.virusres.2016.05.015  
457 (2016).
- 458 2 Graham, R. L., Donaldson, E. F. & Baric, R. S. A decade after SARS: strategies for controlling  
459 emerging coronaviruses. *Nat Rev Microbiol* **11**, 836-848, doi:10.1038/nrmicro3143 (2013).
- 460 3 Woo, P. C. *et al.* Discovery of seven novel Mammalian and avian coronaviruses in the genus  
461 deltacoronavirus supports bat coronaviruses as the gene source of alphacoronavirus and  
462 betacoronavirus and avian coronaviruses as the gene source of gammacoronavirus and  
463 deltacoronavirus. *J Virol* **86**, 3995-4008, doi:10.1128/JVI.06540-11 (2012).
- 464 4 Song, D., Moon, H. & Kang, B. Porcine epidemic diarrhea: a review of current epidemiology  
465 and available vaccines. *Clin Exp Vaccine Res* **4**, 166-176, doi:10.7774/cevr.2015.4.2.166  
466 (2015).
- 467 5 Li, W. *et al.* New variants of porcine epidemic diarrhea virus, China, 2011. *Emerg Infect Dis*  
468 **18**, 1350-1353, doi:10.3201/eid1808.120002 (2012).
- 469 6 Debouck, P. & Pensaert, M. Experimental infection of pigs with a new porcine enteric  
470 coronavirus, CV 777. *Am J Vet Res* **41**, 219-223 (1980).
- 471 7 Stevenson, G. W. *et al.* Emergence of Porcine epidemic diarrhea virus in the United States:



- 472 clinical signs, lesions, and viral genomic sequences. *J Vet Diagn Invest* **25**, 649-654,  
473 doi:10.1177/1040638713501675 (2013).
- 474 8 Anand, K., Ziebuhr, J., Wadhvani, P., Mesters, J. R. & Hilgenfeld, R. Coronavirus main  
475 proteinase (3CLpro) structure: basis for design of anti-SARS drugs. *Science* **300**, 1763-1767,  
476 doi:10.1126/science.1085658 (2003).
- 477 9 Yang, H. *et al.* Design of wide-spectrum inhibitors targeting coronavirus main proteases. *PLoS*  
478 *Biol* **3**, e324, doi:10.1371/journal.pbio.0030324 (2005).
- 479 10 Wang, D. *et al.* Foot-and-mouth disease virus 3C protease cleaves NEMO to impair innate  
480 immune signaling. *J Virol* **86**, 9311-9322, doi:10.1128/JVI.00722-12 (2012).
- 481 11 Wang, D. *et al.* Hepatitis A virus 3C protease cleaves NEMO to impair induction of beta  
482 interferon. *J Virol* **88**, 10252-10258, doi:10.1128/JVI.00869-14 (2014).
- 483 12 Lei, X. *et al.* Enterovirus 71 3C inhibits cytokine expression through cleavage of the  
484 TAK1/TAB1/TAB2/TAB3 complex. *J Virol* **88**, 9830-9841, doi:10.1128/JVI.01425-14 (2014).
- 485 13 Schneider, W. M., Chevillotte, M. D. & Rice, C. M. Interferon-stimulated genes: a complex  
486 web of host defenses. *Annu Rev Immunol* **32**, 513-545,  
487 doi:10.1146/annurev-immunol-032713-120231 (2014).
- 488 14 Wang, H. *et al.* Reciprocal Regulation between Enterovirus 71 and the NLRP3 Inflammasome.  
489 *Cell Rep* **12**, 42-48, doi:10.1016/j.celrep.2015.05.047 (2015).
- 490 15 Wang, D. *et al.* Porcine Epidemic Diarrhea Virus 3C-Like Protease Regulates Its Interferon  
491 Antagonism by Cleaving NEMO. *J Virol* **90**, 2090-2101, doi:10.1128/JVI.02514-15 (2016).
- 492 16 Zhu, X. *et al.* Porcine Deltacoronavirus nsp5 Cleaves DCPIA To Decrease Its Antiviral  
493 Activity. *J Virol* **94**, doi:10.1128/JVI.02162-19 (2020).
- 494 17 Moustaqil, M. *et al.* SARS-CoV-2 proteases PLpro and 3CLpro cleave IRF3 and critical  
495 modulators of inflammatory pathways (NLRP12 and TAB1): implications for disease  
496 presentation across species. *Emerg Microbes Infect* **10**, 178-195,  
497 doi:10.1080/22221751.2020.1870414 (2021).
- 498 18 Shi, J. *et al.* Inflammatory caspases are innate immune receptors for intracellular LPS. *Nature*  
499 **514**, 187-192, doi:10.1038/nature13683 (2014).
- 500 19 Kayagaki, N. *et al.* Non-canonical inflammasome activation targets caspase-11. *Nature* **479**,  
501 117-121, doi:10.1038/nature10558 (2011).
- 502 20 Kayagaki, N. *et al.* Caspase-11 cleaves gasdermin D for non-canonical inflammasome  
503 signalling. *Nature* **526**, 666-671, doi:10.1038/nature15541 (2015).
- 504 21 Liu, X. *et al.* Inflammasome-activated gasdermin D causes pyroptosis by forming membrane  
505 pores. *Nature* **535**, 153-158, doi:10.1038/nature18629 (2016).
- 506 22 Sborgi, L. *et al.* GSDMD membrane pore formation constitutes the mechanism of pyroptotic  
507 cell death. *EMBO J* **35**, 1766-1778, doi:10.15252/embj.201694696 (2016).
- 508 23 Ding, J. *et al.* Pore-forming activity and structural autoinhibition of the gasdermin family.  
509 *Nature* **535**, 111-116, doi:10.1038/nature18590 (2016).
- 510 24 Miao, E. A. *et al.* Caspase-1-induced pyroptosis is an innate immune effector mechanism  
511 against intracellular bacteria. *Nat Immunol* **11**, 1136-1142, doi:10.1038/ni.1960 (2010).
- 512 25 Jorgensen, I., Rayamajhi, M. & Miao, E. A. Programmed cell death as a defence against  
513 infection. *Nat Rev Immunol* **17**, 151-164, doi:10.1038/nri.2016.147 (2017).
- 514 26 Jorgensen, I., Zhang, Y., Krantz, B. A. & Miao, E. A. Pyroptosis triggers pore-induced  
515 intracellular traps (PITs) that capture bacteria and lead to their clearance by efferocytosis. *J*

- 516 *Exp Med* **213**, 2113-2128, doi:10.1084/jem.20151613 (2016).
- 517 27 Lei, X. *et al.* Enterovirus 71 Inhibits Pyroptosis through Cleavage of Gasdermin D. *J Virol* **91**,  
518 doi:10.1128/JVI.01069-17 (2017).
- 519 28 Liang, Q. *et al.* Identification and Functional Analysis of Interleukin-1beta in the Chinese  
520 Soft-Shell Turtle *Pelodiscus sinensis*. *Genes (Basel)* **7**, doi:10.3390/genes7050018 (2016).
- 521 29 Shan, Y. *et al.* Nucleocapsid protein from porcine epidemic diarrhea virus isolates can  
522 antagonize interferon-lambda production by blocking the nuclear factor-kappaB nuclear  
523 translocation. *J Zhejiang Univ Sci B* **19**, 570-580, doi:10.1631/jzus.B1700283 (2018).
- 524 30 Rathkey, J. K. *et al.* Chemical disruption of the pyroptotic pore-forming protein gasdermin D  
525 inhibits inflammatory cell death and sepsis. *Sci Immunol* **3**, doi:10.1126/sciimmunol.aat2738  
526 (2018).
- 527 31 Hu, J. J. *et al.* FDA-approved disulfiram inhibits pyroptosis by blocking gasdermin D pore  
528 formation. *Nat Immunol* **21**, 736-745, doi:10.1038/s41590-020-0669-6 (2020).
- 529 32 Zhu, X. *et al.* Porcine Deltacoronavirus nsp5 Antagonizes Type I Interferon Signaling by  
530 Cleaving STAT2. *J Virol* **91**, doi:10.1128/JVI.00003-17 (2017).
- 531 33 Zhang, L. *et al.* Crystal structure of SARS-CoV-2 main protease provides a basis for design of  
532 improved alpha-ketoamide inhibitors. *Science* **368**, 409-412, doi:10.1126/science.abb3405  
533 (2020).
- 534 34 Stobart, C. C. *et al.* Chimeric exchange of coronavirus nsp5 proteases (3CLpro) identifies  
535 common and divergent regulatory determinants of protease activity. *J Virol* **87**, 12611-12618,  
536 doi:10.1128/JVI.02050-13 (2013).
- 537 35 Chuck, C. P., Chow, H. F., Wan, D. C. & Wong, K. B. Profiling of substrate specificities of  
538 3C-like proteases from group 1, 2a, 2b, and 3 coronaviruses. *PLoS One* **6**, e27228,  
539 doi:10.1371/journal.pone.0027228 (2011).
- 540 36 Ziebuhr, J. & Siddell, S. G. Processing of the human coronavirus 229E replicase polyproteins  
541 by the virus-encoded 3C-like proteinase: identification of proteolytic products and cleavage  
542 sites common to pp1a and pp1ab. *J Virol* **73**, 177-185, doi:10.1128/JVI.73.1.177-185.1999  
543 (1999).
- 544 37 Ye, G. *et al.* Structural basis for the dimerization and substrate recognition specificity of  
545 porcine epidemic diarrhea virus 3C-like protease. *Virology* **494**, 225-235,  
546 doi:10.1016/j.virol.2016.04.018 (2016).
- 547 38 Zhao, Q. *et al.* Structure of the main protease from a global infectious human coronavirus,  
548 HCoV-HKU1. *J Virol* **82**, 8647-8655, doi:10.1128/JVI.00298-08 (2008).
- 549 39 Yamaoka, Y. *et al.* Zika virus protease induces caspase-independent pyroptotic cell death by  
550 directly cleaving gasdermin D. *Biochem Biophys Res Commun* **534**, 666-671,  
551 doi:10.1016/j.bbrc.2020.11.023 (2021).
- 552 40 Wang, W. *et al.* Zika virus infection induces host inflammatory responses by facilitating  
553 NLRP3 inflammasome assembly and interleukin-1beta secretion. *Nat Commun* **9**, 106,  
554 doi:10.1038/s41467-017-02645-3 (2018).
- 555 41 Zhou, Y. *et al.* Effect of route of inoculation on innate and adaptive immune responses to  
556 porcine epidemic diarrhea virus infection in suckling pigs. *Vet Microbiol* **228**, 83-92,  
557 doi:10.1016/j.vetmic.2018.11.019 (2019).

558

559

## 560 **Figure legends**

561 **Fig. 1 pGSDMD is degraded in PEDV-infected cells.** (A and B) IPEC-J2 cells were mock  
562 infected or infected with PEDV at an MOI of 1. At the indicated time points, the supernatants  
563 were collected and analyzed for LDH level, and cell lysates were processed for Western blotting.  
564 n.s.,  $P > 0.05$ ; \*,  $P < 0.05$ . (C and D) Vero cells were transfected with plasmid encoding  
565 p3×Flag-N-GSDMD-FL. At 24 h after transfection, the cells were mock infected or infected with  
566 PEDV at an MOI of 0.5. At the indicated time points after infection, the supernatants were  
567 collected and analyzed for LDH level, and cell lysates were processed for Western blotting. n.s.,  $P >$   
568  $0.05$ ; \*\*,  $P < 0.01$ . (E) IPEC-J2 cells were mock infected or infected with different doses of PEDV.  
569 At 24 h after infection, the cells were then processed for Western blotting. (F) Vero cells were  
570 transfected with plasmid encoding p3×Flag-N-GSDMD-FL. At 24 h after transfection, the cells  
571 were mock infected or infected with different doses of PEDV for another 24 h, and then the cells  
572 were processed for Western blotting.

573

574 **Fig. 2 pCaspase-1 mediates pGSDMD cleavage at residue D279.** (A and B) HEK293T cells  
575 were mock transfected or transfected with plasmids encoding HA-caspase-1 and  
576 p3×Flag-N-GSDMD-FL or p3×Flag-C-GSDMD-FL. At the indicated time points after transfection,  
577 the supernatants were collected and analyzed for LDH levels (A). At 24 h after transfection, the  
578 cells were then processed for Western blotting (B). \*\*\*,  $P < 0.001$ . (C, D and E) HEK293T cells  
579 were transfected with plasmids as shown. At the indicated time points after transfection, the  
580 supernatants were collected and analyzed for LDH levels (C). At 24 h after transfection, the cells  
581 were staining with PI and analyzed with Fluorescence microscopy (D) or processed for Western  
582 blotting (E). \*\*\*,  $P < 0.001$ ; n.s.,  $P > 0.05$ . (F) Cartoon diagram of porcine GSDMD structure and  
583 the cleavage site by caspase-1. (G) HEK293T cells were transfected with plasmids encoding  
584 HA-caspase-1 and p3×Flag-C-GSDMD-FL or p3×Flag-C-GSDMD-1-279 aa. At 24 h after  
585 transfection, the supernatants were collected and analyzed for LDH levels. \*\*\*,  $P < 0.001$ . (H) The  
586 modeled pGSDMD-FL, pGSDMD-N and pGSDMD-C structure.

587

588

589 **Fig. 3 L295/Y378/A382 are the key sites for pGSDMD autoinhibition.** (A) HEK293T cells  
590 were mock transfected or transfected with plasmids encoding pGSDMD-FL, pGSDMD-p30 and  
591 its point mutants. At 24 h after transfection, the supernatants were collected and analyzed for LDH  
592 levels. n.s.,  $P > 0.05$ . (B) HEK293T cells were mock transfected or transfected with plasmids  
593 encoding pGSDMD-FL and pCaspase-1, pGSDMD-p30, hGSDMD-FL and hCaspase-1,  
594 hGSDMD-p30. Meanwhile, cells were treated with mock, NSC (final concentration of 25  $\mu$ M) or  
595 NSA (final concentration of 10  $\mu$ M). At 24 h after transfection, the supernatants were collected  
596 and analyzed for LDH levels. \*,  $P < 0.05$ ; \*\*,  $P < 0.01$ ; \*\*\*,  $P < 0.001$ . (C) The structure of  
597 modeled pGSDMD-FL and enlarged view of the boxed area. (D and E) HEK293T cells were  
598 mock transfected or transfected with plasmids encoding pGSDMD-p30, pGSDMD-FL and its  
599 point mutants. At 24 h after transfection, the supernatants were collected and analyzed for LDH  
600 levels. \*\*,  $P < 0.01$ ; \*\*\*,  $P < 0.001$ .

601

602 **Fig. 4 PEDV Nsp5 associates with and cleaves pGSDMD.** (A) Vero cells were mock transfected  
603 or transfected with plasmids encoding pGSDMD-p30 and pGSDMD-FL. At 4 h after transfection,  
604 the cells were mock infected or infected with PEDV at an MOI of 0.1. After 36 h, the supernatants  
605 were collected and analyzed for LDH levels. n.s.,  $P > 0.05$ ; \*,  $P < 0.05$ . (B) Vero cells were  
606 transfected with plasmids encoding pGSDMD-p30 and pGSDMD-FL. An empty vector was used  
607 as a control. At 24 h after transfection, the cells were infected with PEDV at an MOI of 0.5. After  
608 24 h, total RNA was extracted and the viral RNA levels of PEDV were evaluated by quantitative  
609 real-time PCR using SYBR green. Data were expressed as fold change of the PEDV mRNA level  
610 relative to that of the control vector. \*\*,  $P < 0.01$ . (C) HEK293T cells were transfected with  
611 plasmids encoding PEDV-Nsp5 and pGSDMD-p30, or co-transfected with these two plasmids. At  
612 24 h and 36 h after transfection, the supernatants were collected and analyzed for LDH levels. \*,  $P$   
613  $< 0.05$ . (D) HEK293T cells were transfected with plasmids as shown. At 24 h after transfection,  
614 the cells were then processed for Western blotting. (E) HEK293T cells were transfected with  
615 plasmids encoding p3 $\times$ Flag-N-GSDMD-FL and various dose of MYC-Nsp5. After 24 h, cells  
616 were lysed for Western blotting. (F) HEK293T cells were transfected with plasmids encoding  
617 GFP-pGSDMD and MYC-Nsp5 for 24 h, and then MYC-Nsp5 were labeled with specific primary  
618 antibodies and secondary antibodies (red). Cell nuclei were stained with DAPI (blue). The

619 fluorescent signals were observed with confocal immunofluorescence microscopy. HEK293T cells  
620 were transfected with plasmids encoding GFP-pGSDMD or MYC-Nsp5 as control. (G) HEK293T  
621 cells were transfected with plasmids encoding MYC-Nsp5 and vector or p3×Flag-N-GSDMD-FL  
622 for 24 h, followed by CoIP with anti-Flag binding beads and a Western blotting analysis. (H)  
623 HEK293T cells were transfected with plasmids encoding p3×Flag-N-GSDMD-FL and wild-type  
624 PEDV Nsp5 or its protease-defective mutants (H41A and C144A). After 24 h, cells were lysed for  
625 Western blotting. (I) HEK293T cells were transfected with plasmids as shown, followed by CoIP  
626 with anti-Flag binding beads and a Western blotting analysis.

627

628 **Fig. 5 PEDV Nsp5 cleaves pGSDMD at residue Q193.** (A) Logo analysis of the predicted  
629 cleavage site of PEDV Nsp5. (B) HEK293T cells were transfected with plasmids encoding  
630 MYC-Nsp5 and p3×Flag-N-GSDMD-FL or its mutant, including p3×Flag-N-GSDMD-FL-Q193A,  
631 p3×Flag-N-GSDMD-FL-Q195A, p3×Flag-N-GSDMD-FL-Q197A. Cells were then lysed after 24  
632 h and evaluated by Western blotting. (C) Cartoon diagram of pGSDMD structure and the cleavage  
633 site by PEDV Nsp5. (D) HEK293T cells were mock transfected or transfected with the plasmids  
634 encoding pGSDMD-FL, pGSDMD-p30, pGSDMD-1-193, pGSDMD-194-279 and  
635 pGSDMD-194-279. After 24 h, the supernatants were collected and analyzed for LDH levels and  
636 the cell were then processed for Western blotting. \*\*, P < 0.01. (E) HEK293T cells were  
637 transfected with the plasmids as shown. After 24 h, the cells were then processed for Western  
638 blotting. (F) HEK293T cells were transfected with plasmids encoding HA-caspase-1 and vector,  
639 pGSDMD-FL, pGSDMD-1-193, pGSDMD-194-488, or pGSDMD-194-279, followed by CoIP  
640 with anti-Flag binding beads and a Western blotting analysis. (G) Vero cells were transfected with  
641 plasmids encoding pGSDMD and its variants as indicated. At 24 h after transfection, cells were  
642 infected with PEDV at an MOI of 0.5. After 24 h, total RNA was extracted, and the viral RNA  
643 level of PEDV were evaluated by quantitative real-time PCR using SYBR green. \*\*, P < 0.01.

644

645 **Fig. 6 The T239 and F240 amino acids of the N terminus of pGSDMD are necessary for its**  
646 **induced pyroptosis.** (A and B) HEK293T cells were transfected with plasmids encoding  
647 pGSDMD-FL and its variants. After 24 h, the supernatants were collected and analyzed for LDH  
648 levels, and the cells were dyeing with PI. \*\*\*, P < 0.001; \*\*, P < 0.01. (C) HEK293T cells were

649 transfected with plasmids encoding pGSDMD-p30 and its point mutants. After 24 h, the  
650 supernatants were collected and analyzed for LDH levels. \*\*, P < 0.01. (D) Vero cells were  
651 transfected with the plasmids encoding pGSDMD-FL, pGSDMD-p30 and its point mutants  
652 (pGSDMD-p30-T239D, pGSDMD-p30-F240D). At 24 h after transfection, cells were infected  
653 with PEDV at an MOI of 0.5. After 24 h, total RNA was extracted, and the viral RNA level of  
654 PEDV were evaluated by quantitative real-time PCR using SYBR green. \*\*\*, P < 0.001.

655

656 **Fig. 7 GSDMD is a common target of Nsp5 of different coronaviruses.** (A) Structure alignment  
657 of CoVs Nsp5. Red arrows indicate conserved enzymatic proteolysis residues His41 and Cys144.  
658 The 3D structures were derived from the Protein Data Bank with the following accession numbers:  
659 PEDV, 4XFQ; SARS-CoV-2, 7BUY; MERS-CoV, 5WKK; PDCoV, 6JIJ. (B) HEK293T cells were  
660 transfected with plasmids encoding p3×Flag-N-GSDMD-FL and Nsp5 encoded by PEDV, PDCoV,  
661 SARS-CoV-2, MERS-CoV. After 24 h, cells were lysed and detected by Western blotting. (C)  
662 HEK293T cells were transfected with plasmids encoding pGSDMD and wild-type PDCoV Nsp5  
663 or its protease-defective mutants (H41A and C144A). After 24 h, cells were lysed for Western  
664 blotting. (D and E) HEK293T cells were transfected with plasmids encoding pGSDMD and  
665 wild-type SARS-CoV-2 Nsp5 or its protease-defective mutants (H41A and C145A), hGSDMD  
666 and wild-type SARS-CoV-2 Nsp5 or its protease-defective mutants (H41A and C145A). After 24  
667 h, cells were lysed for Western blotting. (F and G) HEK293T cells were transfected with plasmids  
668 encoding pGSDMD and wild-type MERS-CoV Nsp5 or its protease-defective mutants (H41A and  
669 C148A), hGSDMD and wild-type MERS-CoV Nsp5 or its protease-defective mutants (H41A and  
670 C148A). After 24 h, cells were lysed for Western blotting.

671

672 **Figure 8** Homology modeling of Nsp5 of different CoVs with the cleaved GSDMD peptide  
673 substrate. The molding structure of PEDV Nsp5 (PDB accession number 4XFQ) (A),  
674 SARS-CoV-2 (PDB accession number 7BUY) (B and E), MERS-CoV (PDB accession number  
675 5WKK) (C and F), PDCoV (PDV accession number 6JIJ) (D) combined with the cleaved  
676 pGSDMD peptide substrate GAVSLQ(193)↓GQGQGH (downward arrows indicates cleavage  
677 sites) (A, B, C and D) and hGSDMD peptide substrate GATCLQ(193)↓GEGQGH (downward  
678 arrows indicates cleavage sites) (E and F) were analyzed using PyMOL software.

679 **Figure 9** Diagram of CoVs antagonize GSDMD-mediated pyroptosis.

680

681 **Extended Data Figure 1** Alignment of the amino acid sequence of pGSDMD and other GSDMD  
682 homologs from human (GenBank accession NP\_001159709.1) and mouse (GenBank accession  
683 6N9N\_A).

684

685 **Extended Data Figure 2** HEK293T cells were mock transfected or transfected with plasmids  
686 encoding p3×Flag-N-GSDMD-FL. At 24 h after transfection, cell lysates were analyzed by  
687 Western blotting with antibodies for Flag,  $\beta$ -actin and the polyclonal antibody directed against  
688 pGSDMD prepared in our laboratory.

689

690 **Extended Data Figure 3** HEK293T cells were mock transfected or transfected with plasmids as  
691 shown. At 24 h after transfection, the cells were processed and staining with PI, and then analyzed  
692 with Fluorescence microscopy (A) and Flow cytometry (B).

693

694 **Extended Data Figure 4** HEK293T cells were mock transfected or transfected with the plasmids  
695 encoding EGFP-GSDMD-FL, EGFP-GSDMD-p30, EGFP-GSDMD-1-193,  
696 EGFP-GSDMD-194-279, EGFP-GSDMD-194-488. After 48 h, the supernatants were collected  
697 and analyzed for LDH levels, and the cells were analyzed with Fluorescence microscopy. \*,  $P <$   
698 0.05.

699

700 **Extended Data Figure 5** HEK293T cells were transfected with plasmids encoding pGSDMD-p30  
701 and its point mutants. After 24 h, the cells were dyeing with PI and analyzed with Fluorescence  
702 microscopy.

703

704 **Extended Data Figure 6** Alignment of the amino acid sequence of Nsp5 of PEDV with Nsp5 of  
705 PDCoV (GenBank accession AKQ63081.1), SARS-CoV-2 (GenBank accession NC\_045512) and  
706 MERS-CoV (GenBank accession NC\_038294).

707

708 **Supplementary Tables** Primers used in this study.

Fig. 1

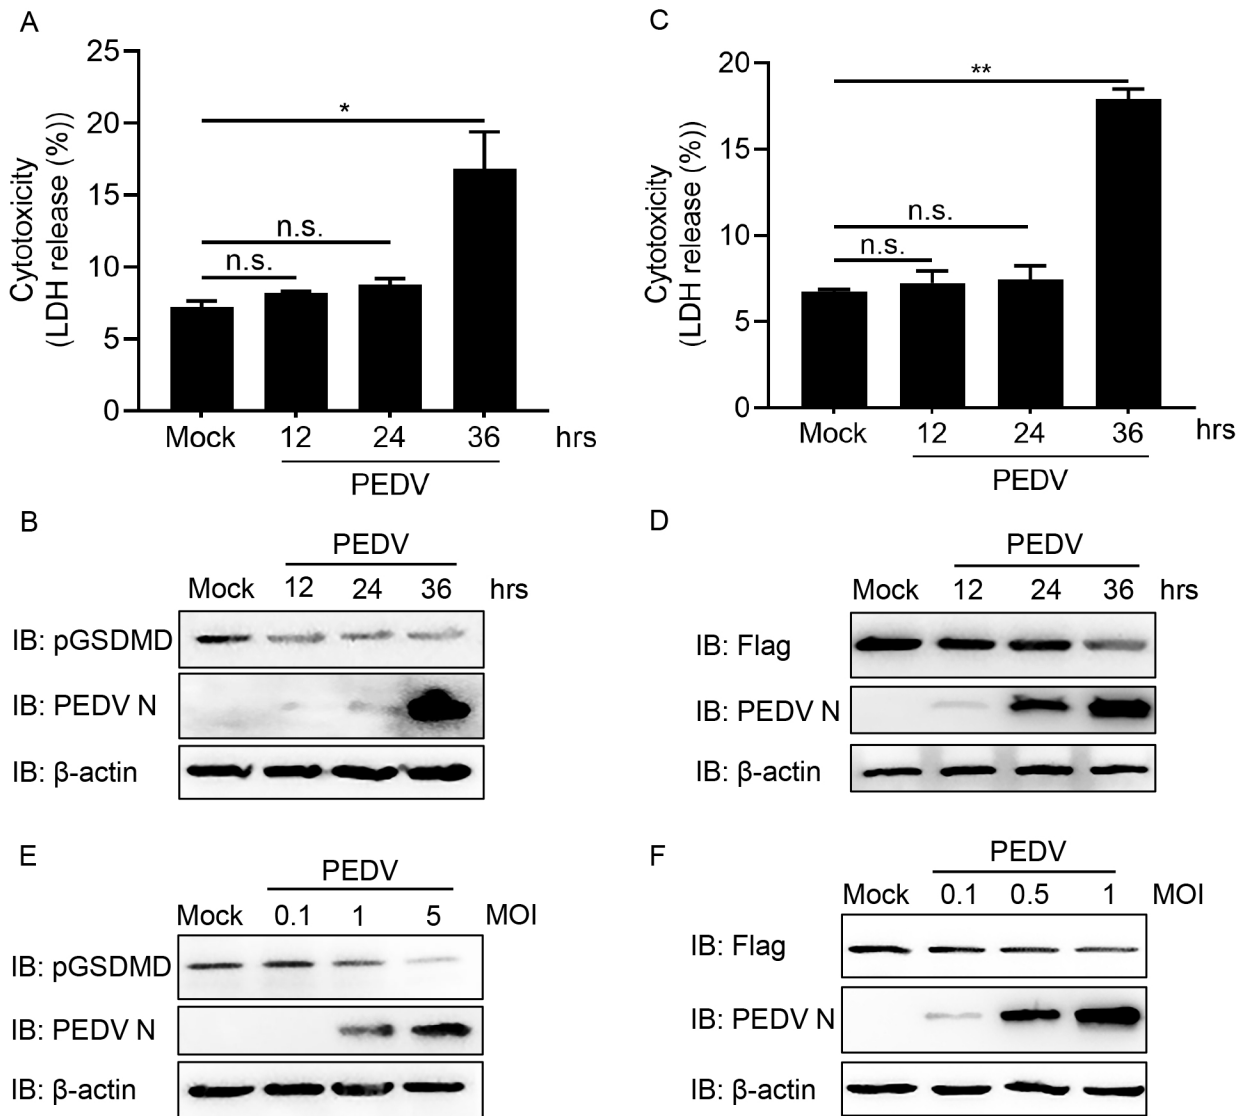



Fig. 2

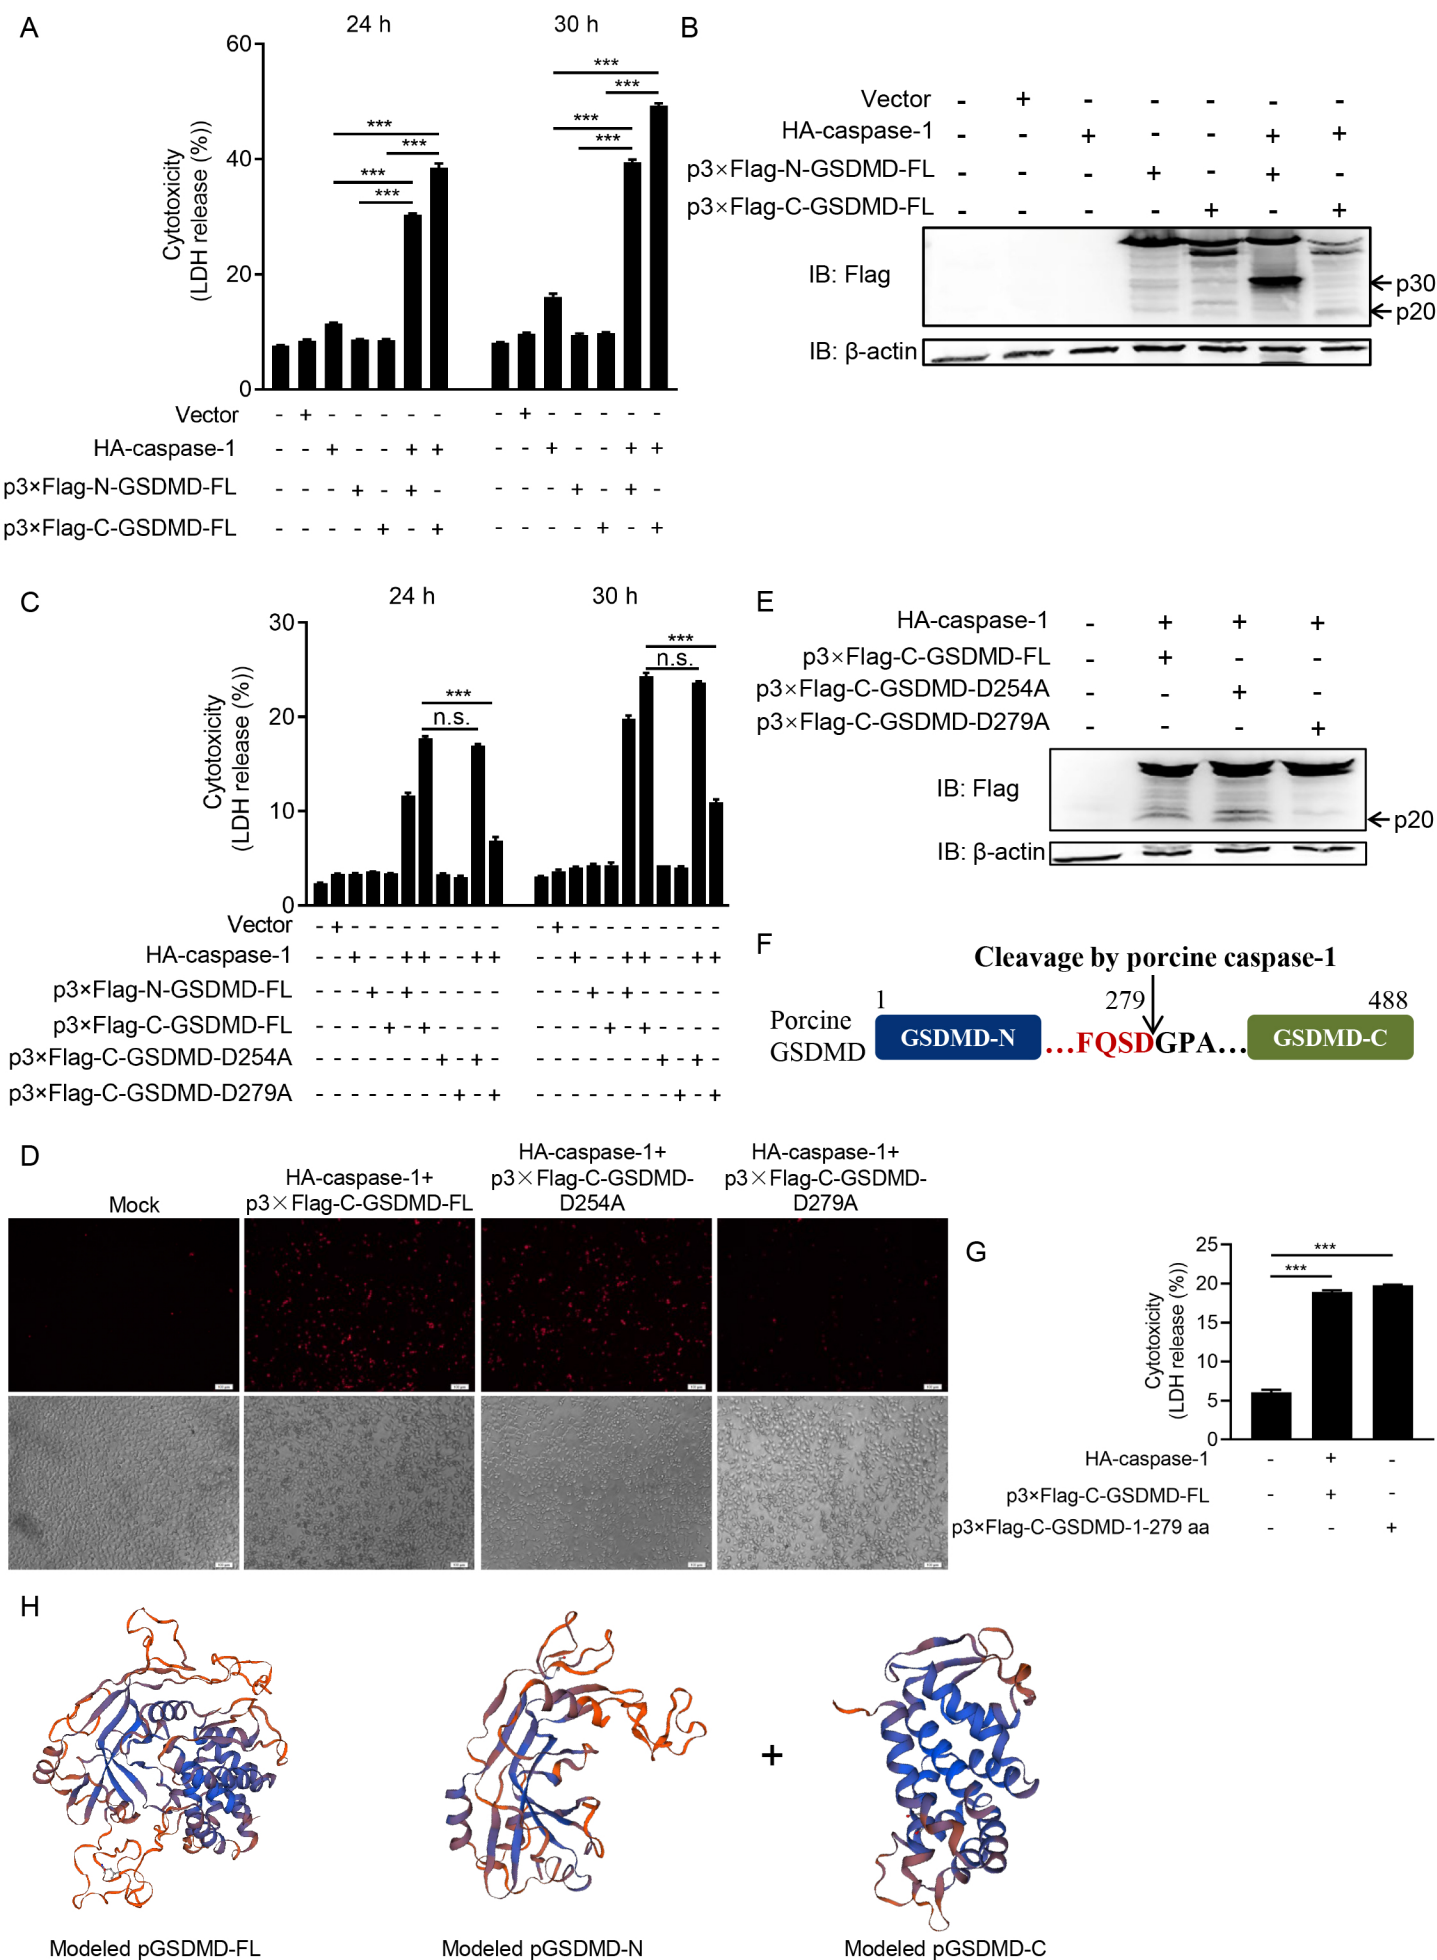

Fig. 3

A

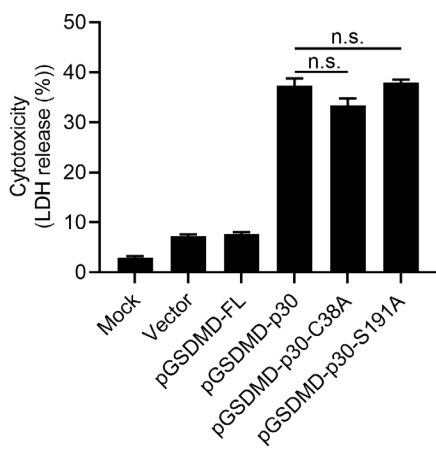

B

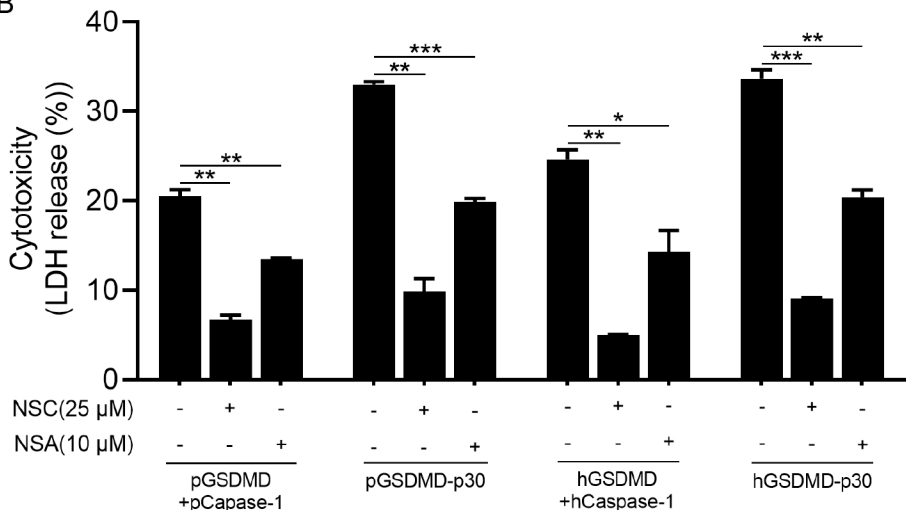

C

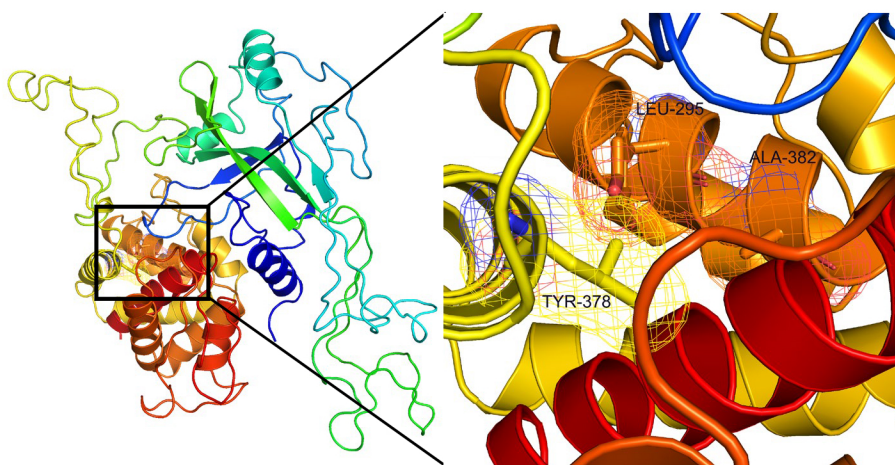

D

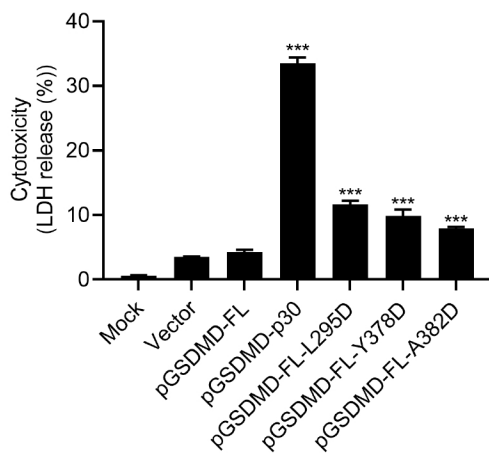

E

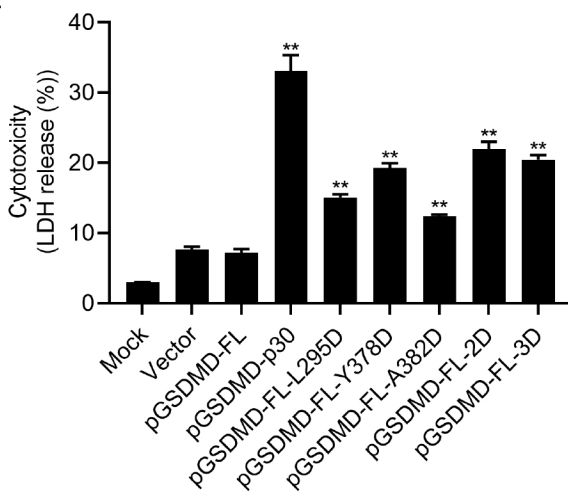

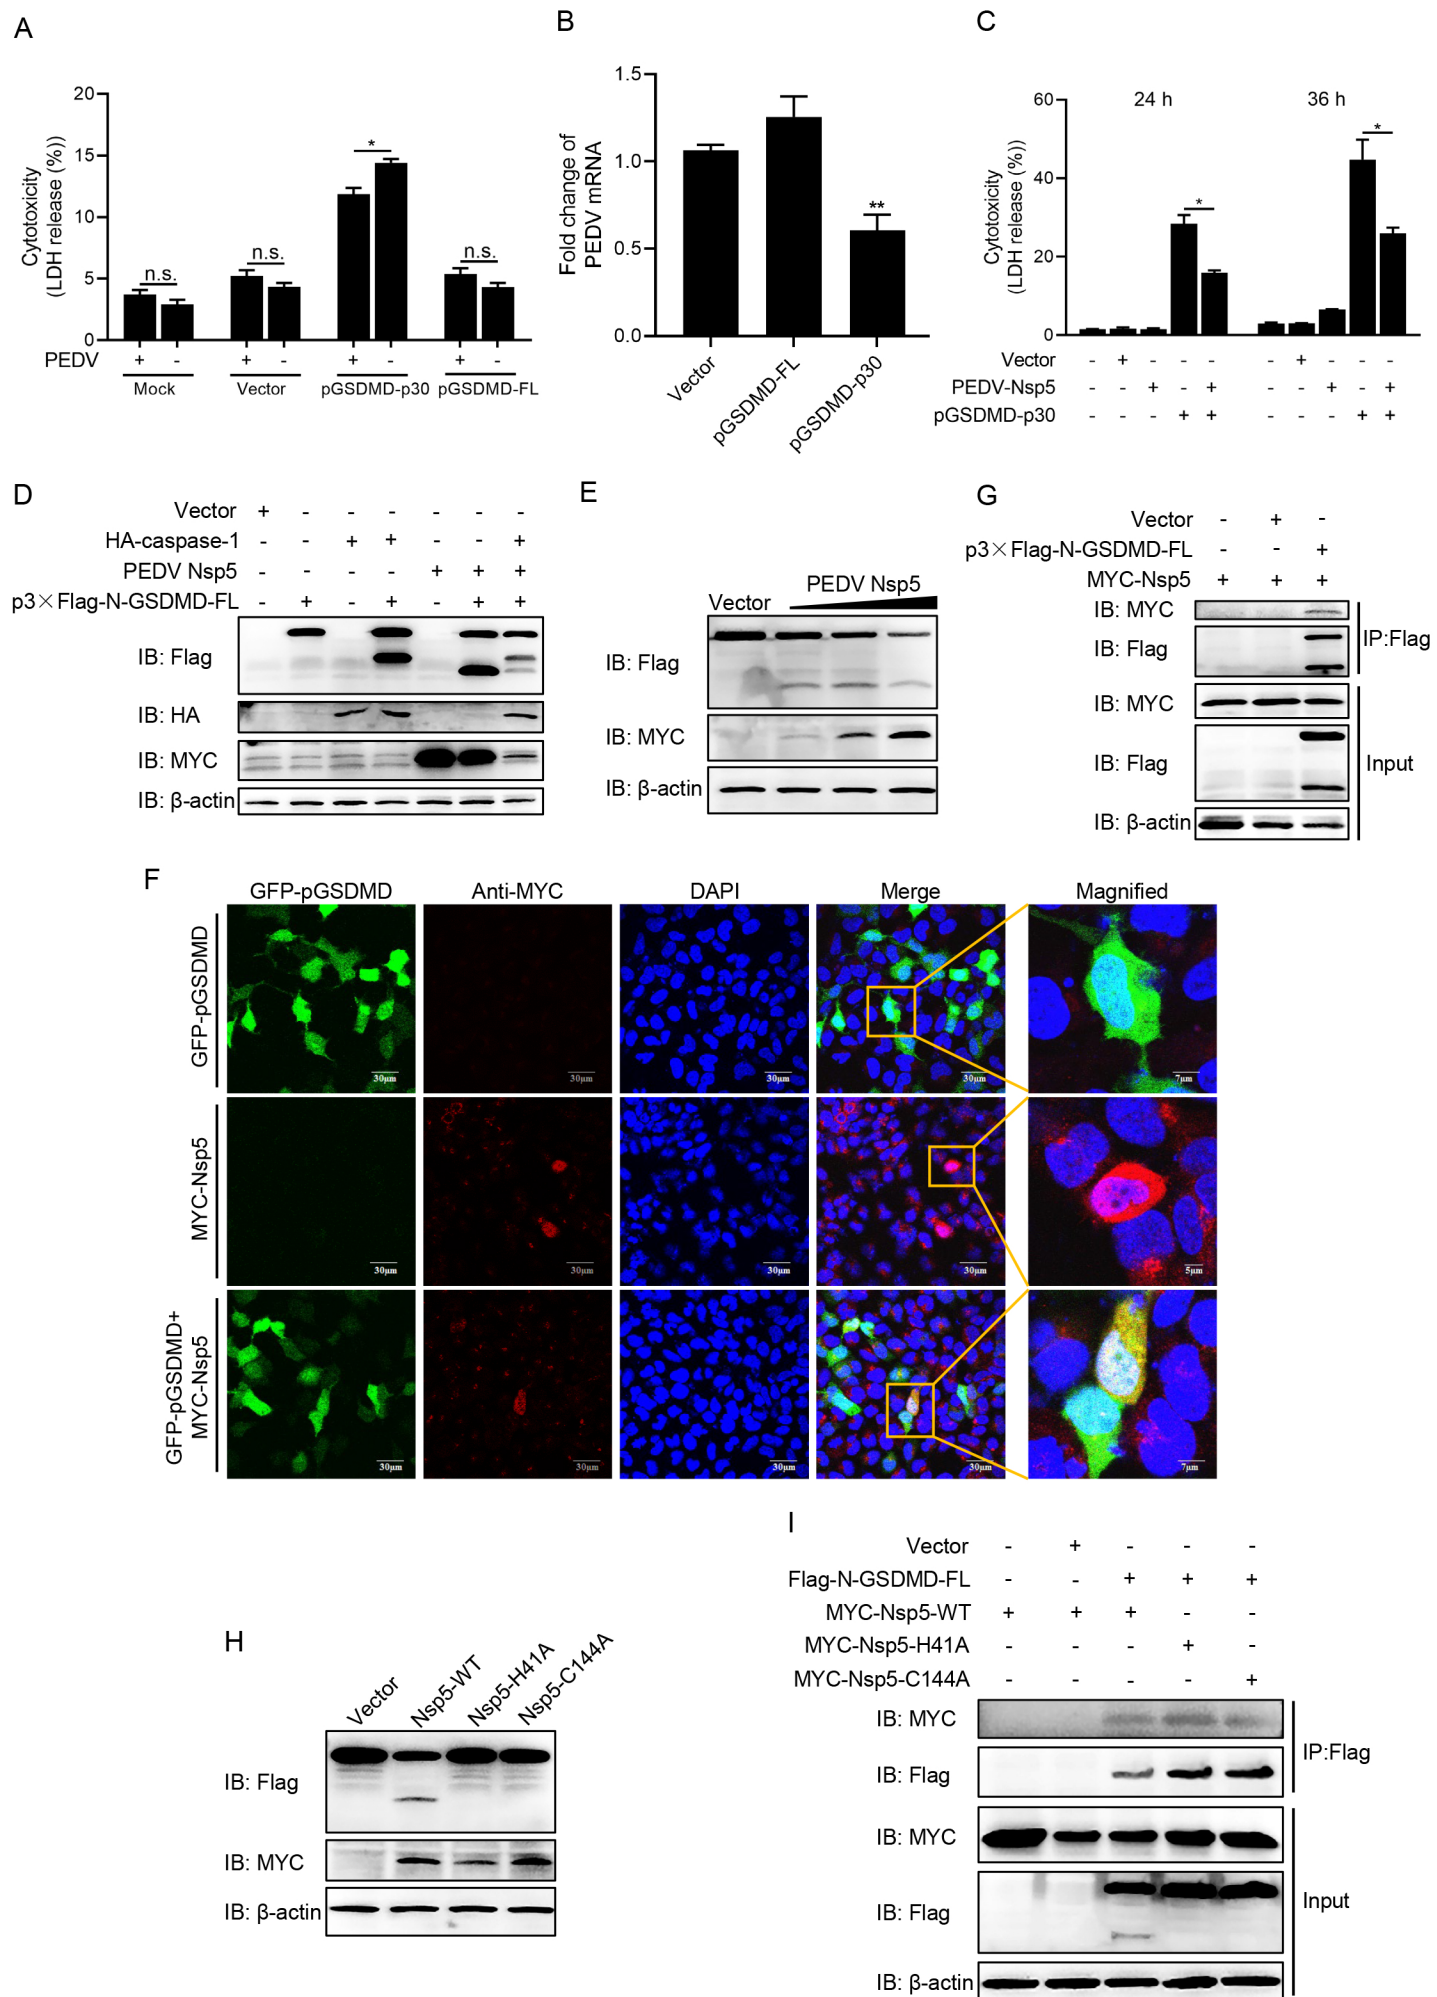

Fig. 5

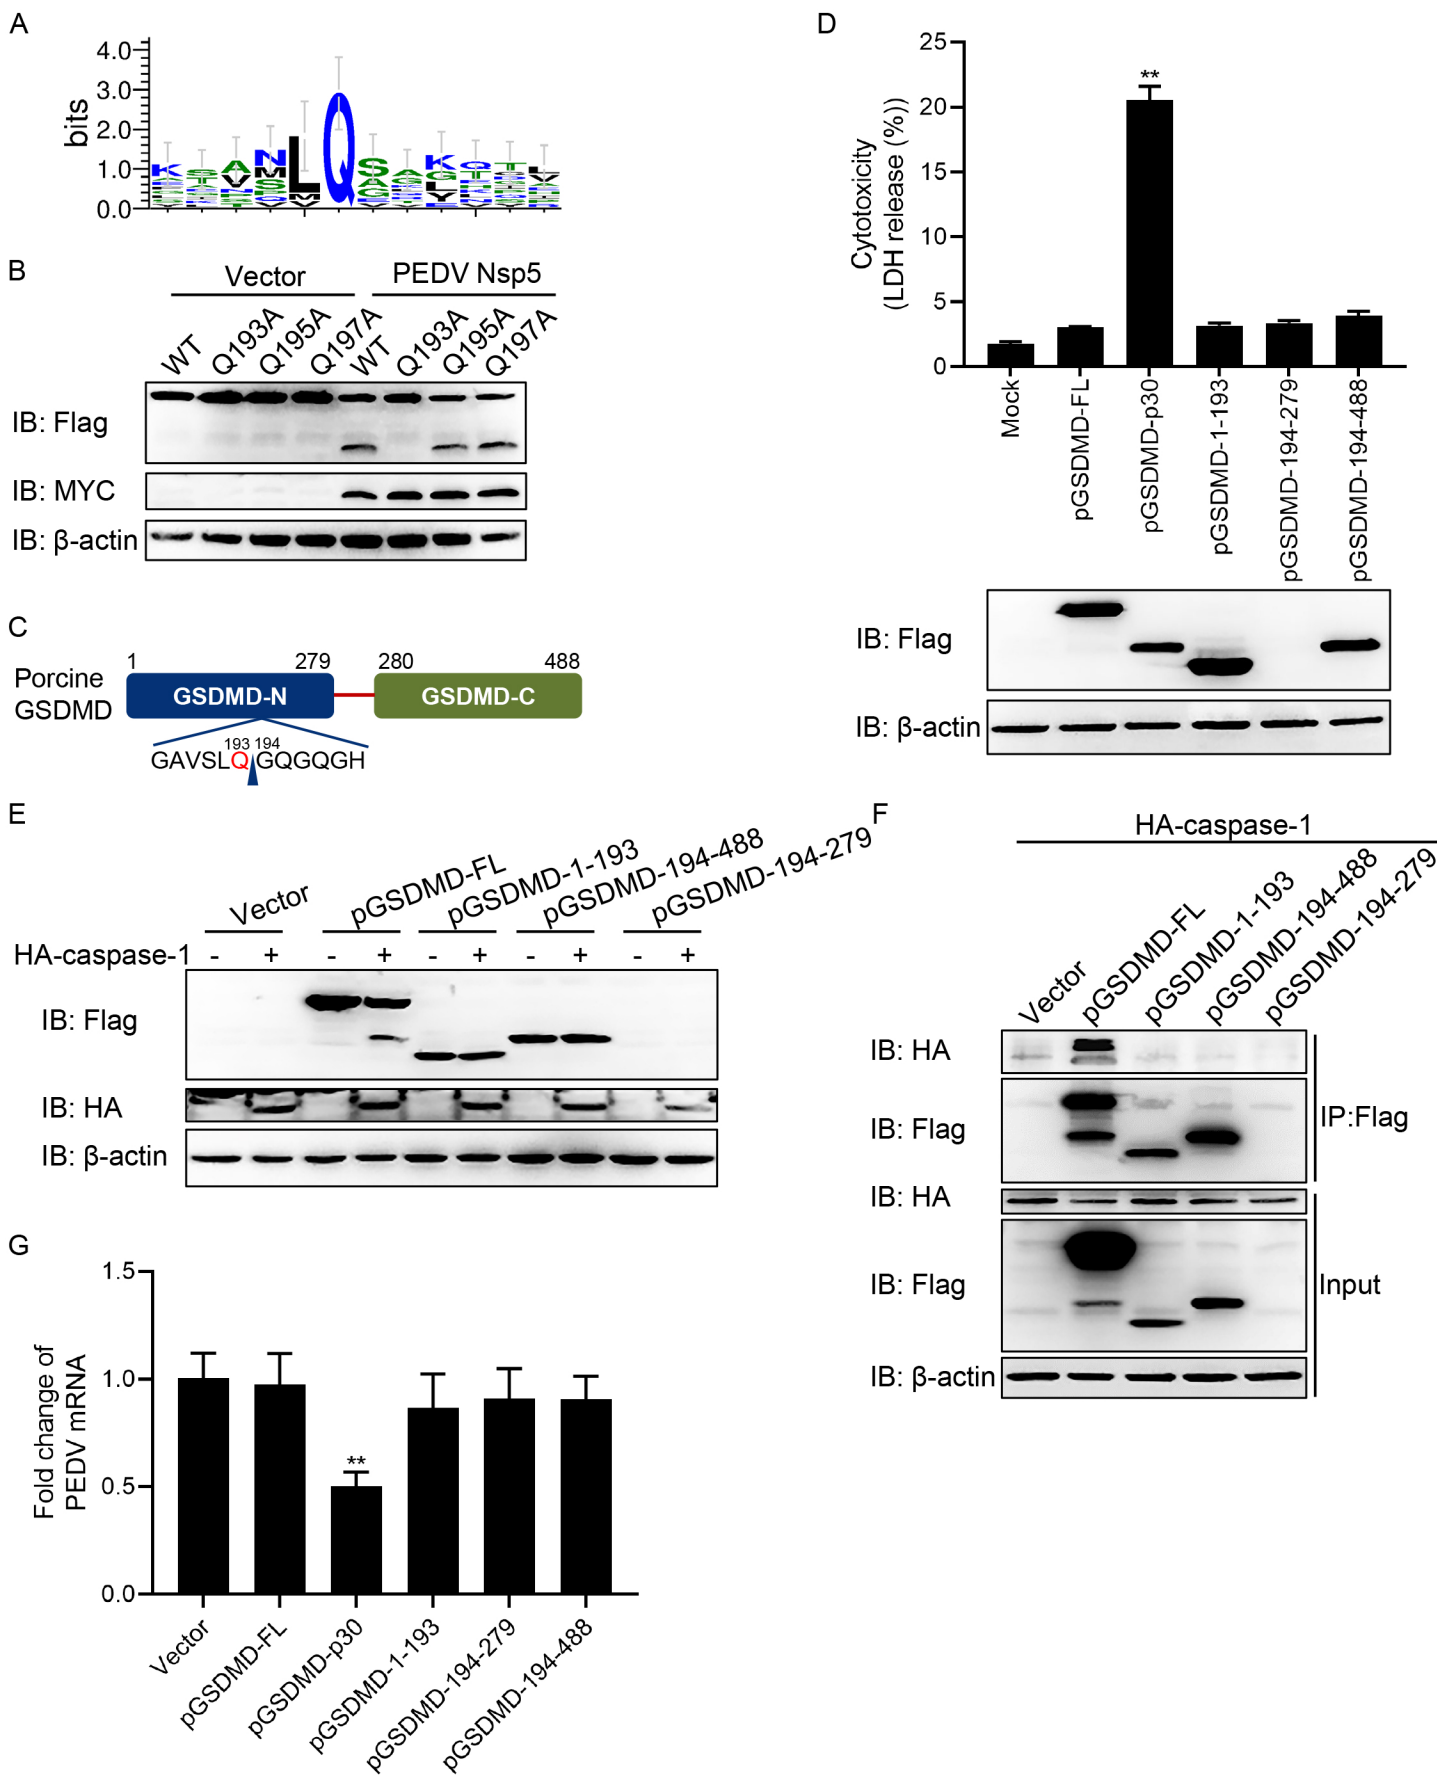

Fig. 6

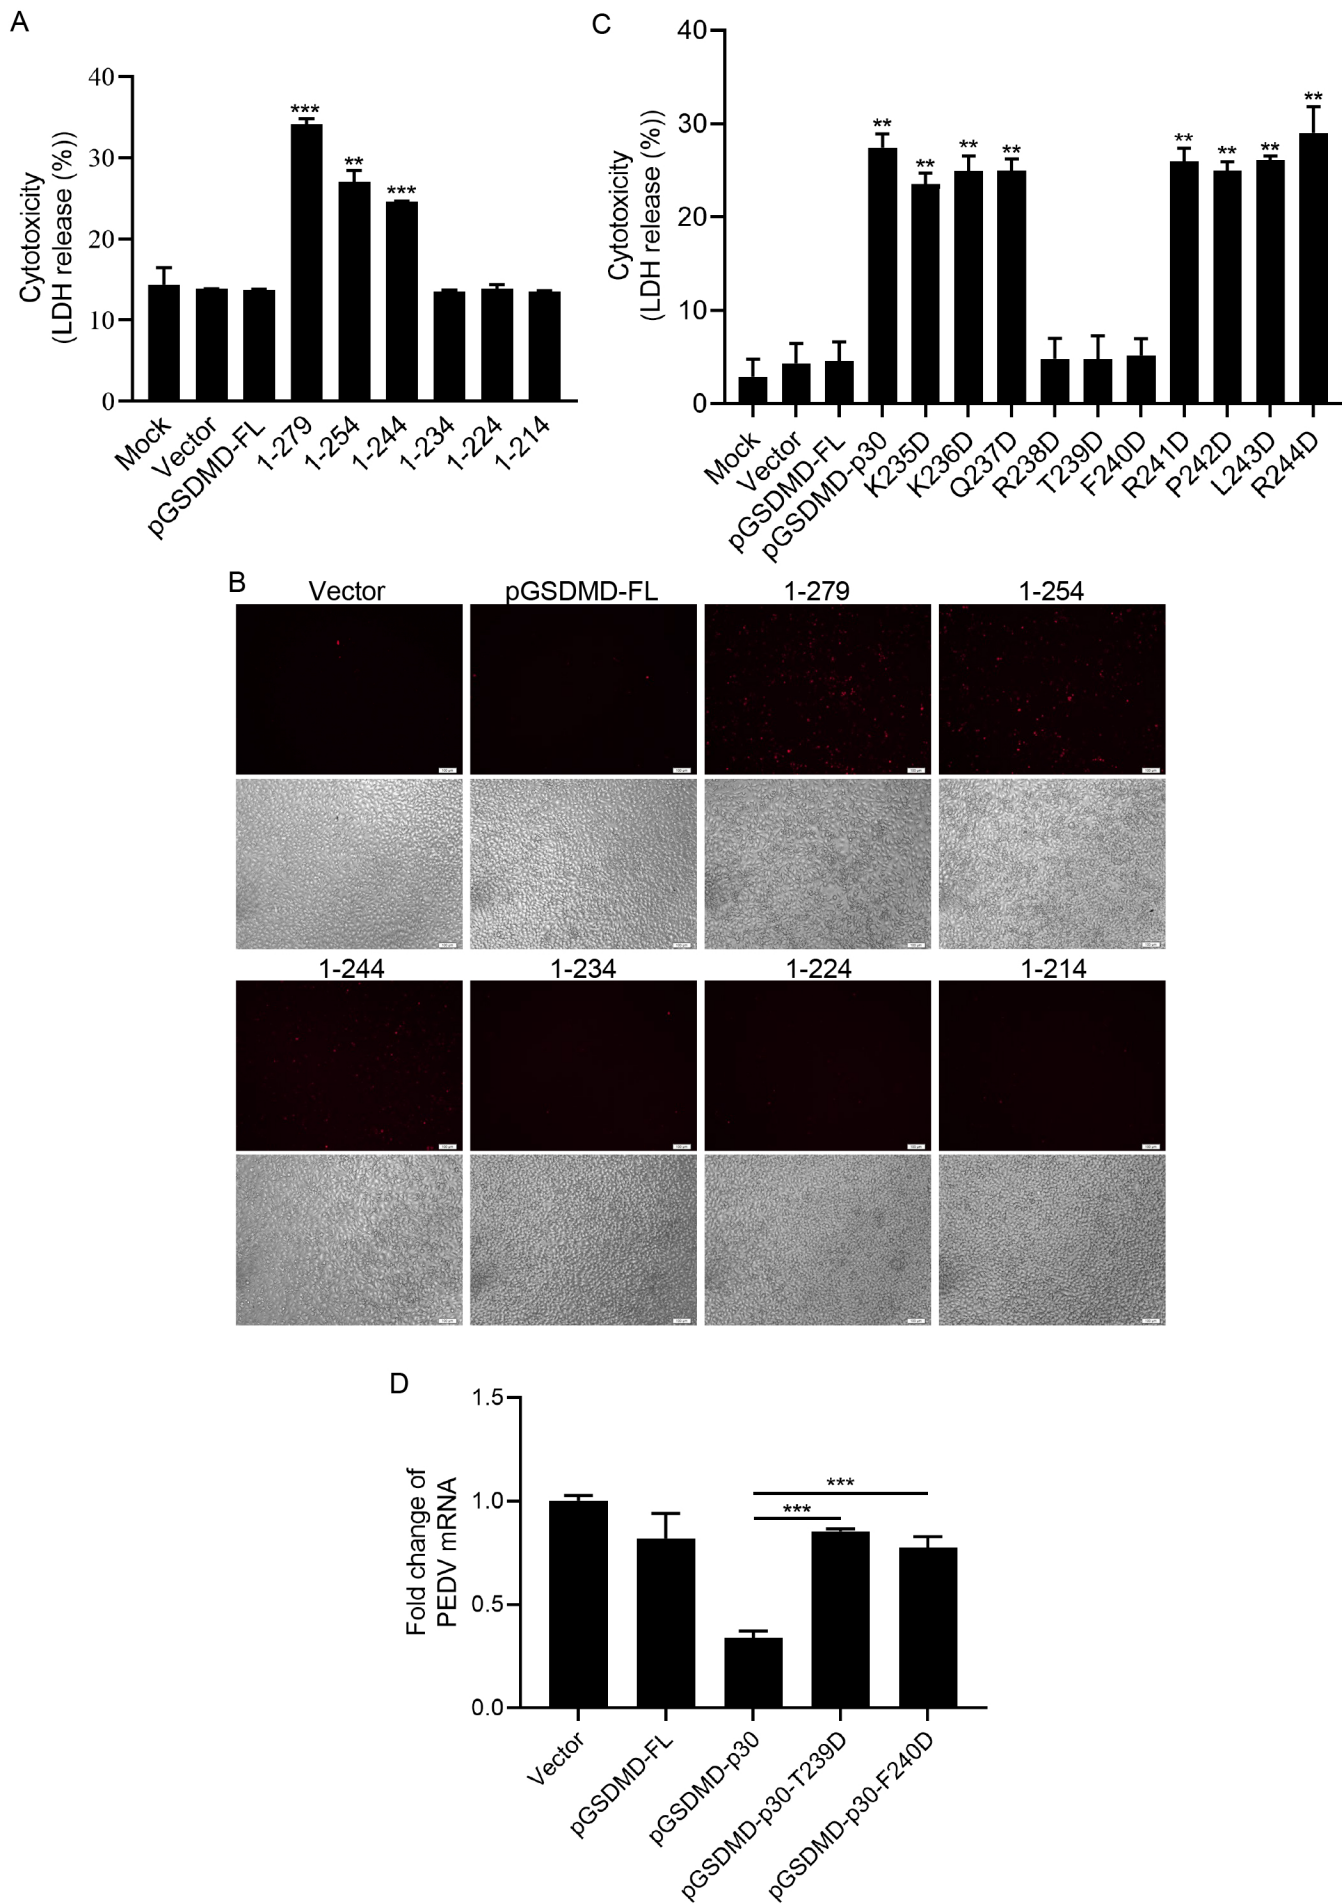

Fig. 7

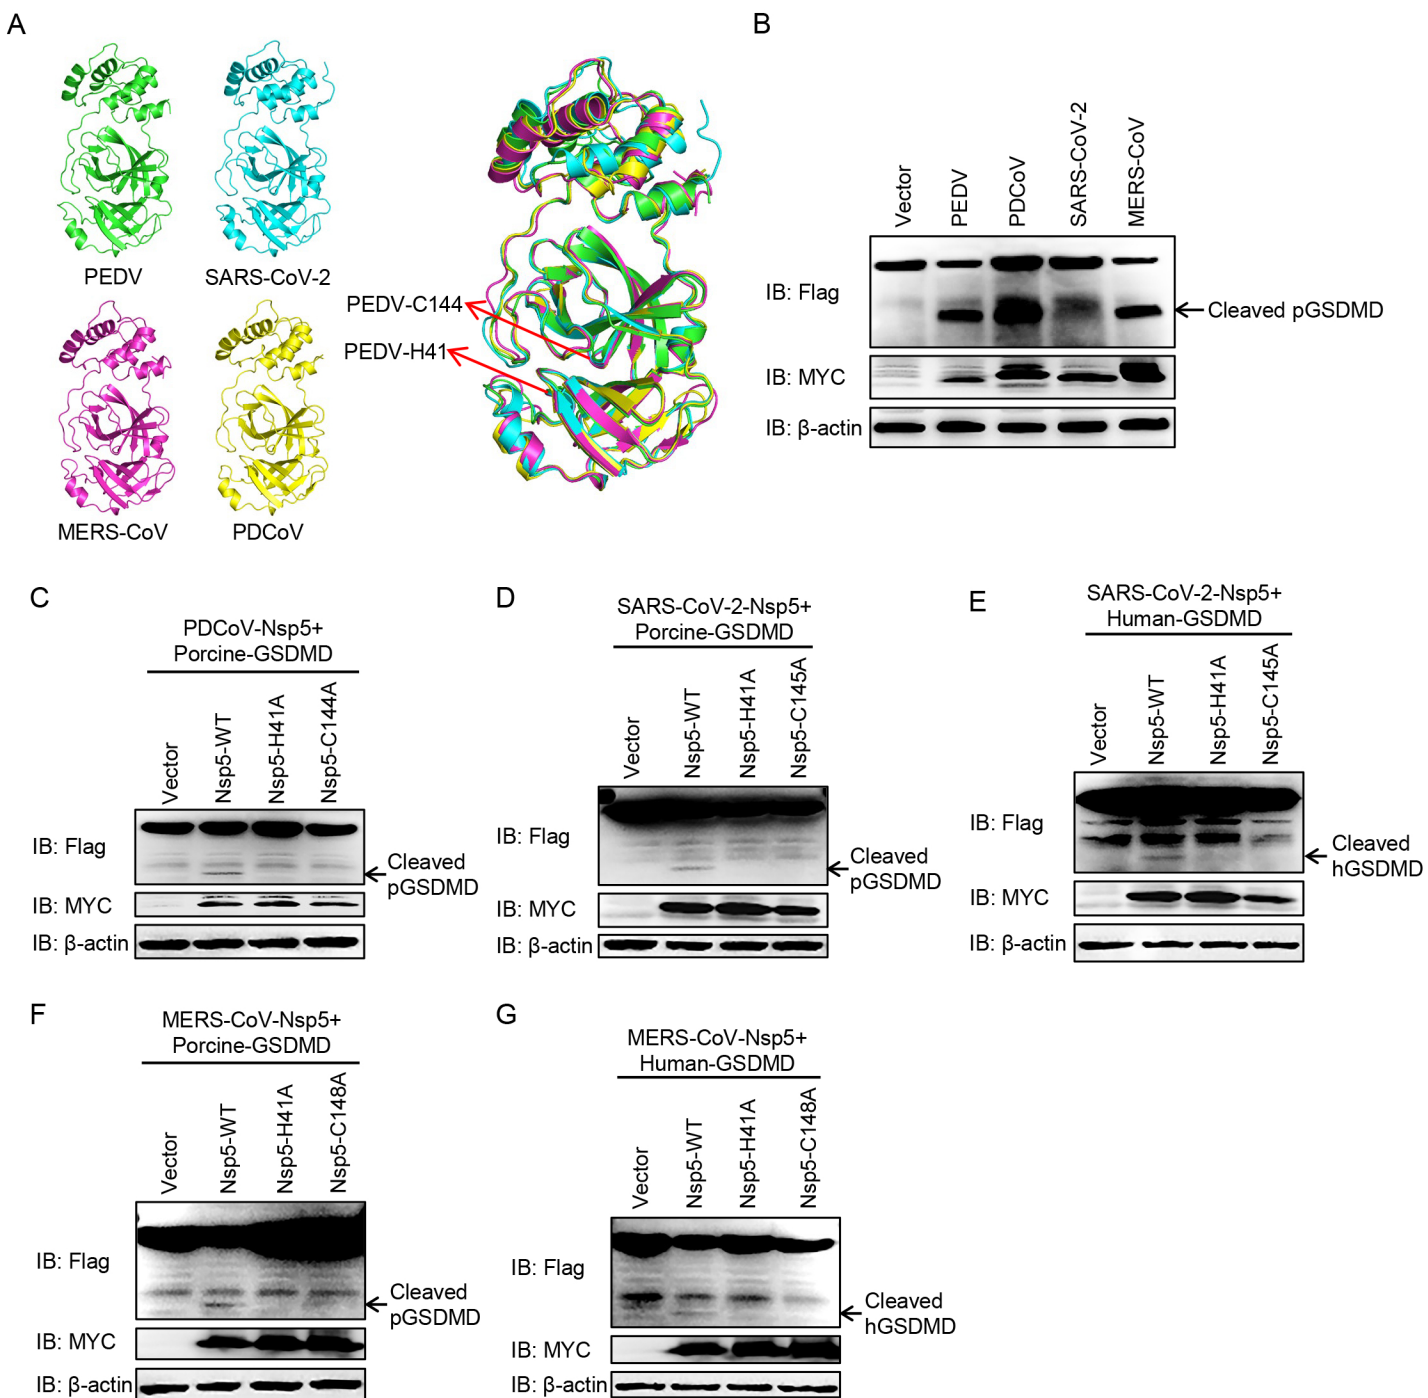

Fig. 8

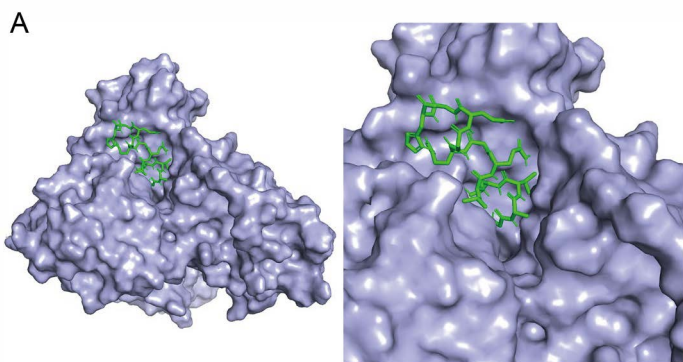

PEDV Nsp5 in complex with GAVSLQ(193)↓GQGQGH

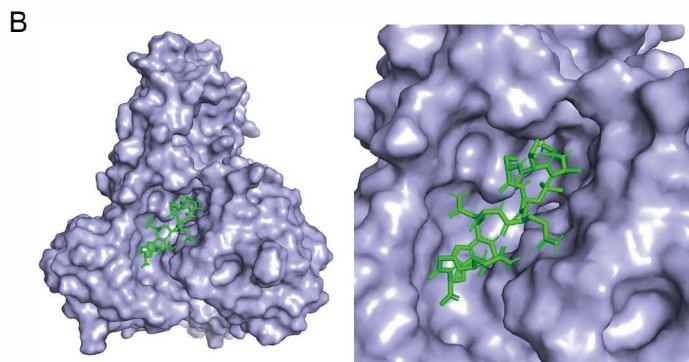

SARS-CoV-2 Nsp5 in complex with GAVSLQ(193)↓GQGQGH

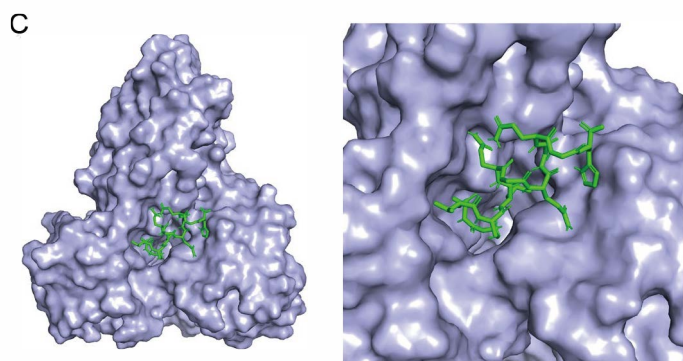

MERS-CoV Nsp5 in complex with GAVSLQ(193)↓GQGQGH

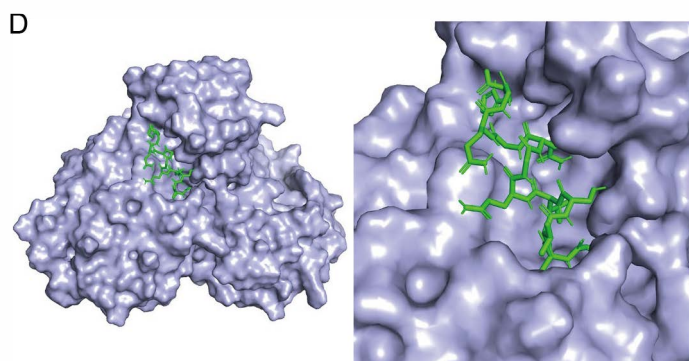

PDCoV Nsp5 in complex with GAVSLQ(193)↓GQGQGH

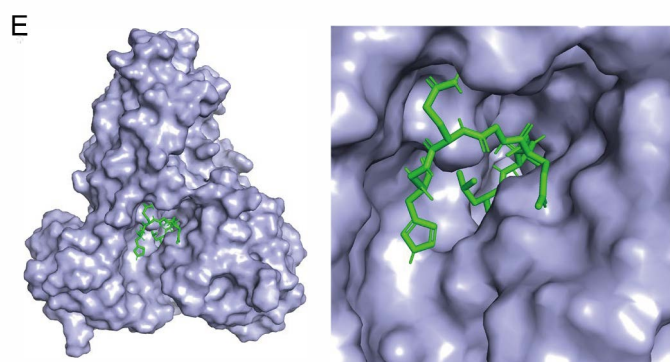

SARS-CoV-2 Nsp5 in complex with GATCLQ(193)↓GEGQGH

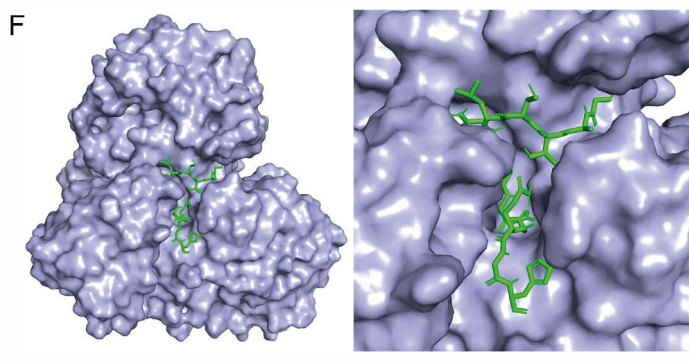

MERS-CoV Nsp5 in complex with GATCLQ(193)↓GEGQGH

Fig. 9

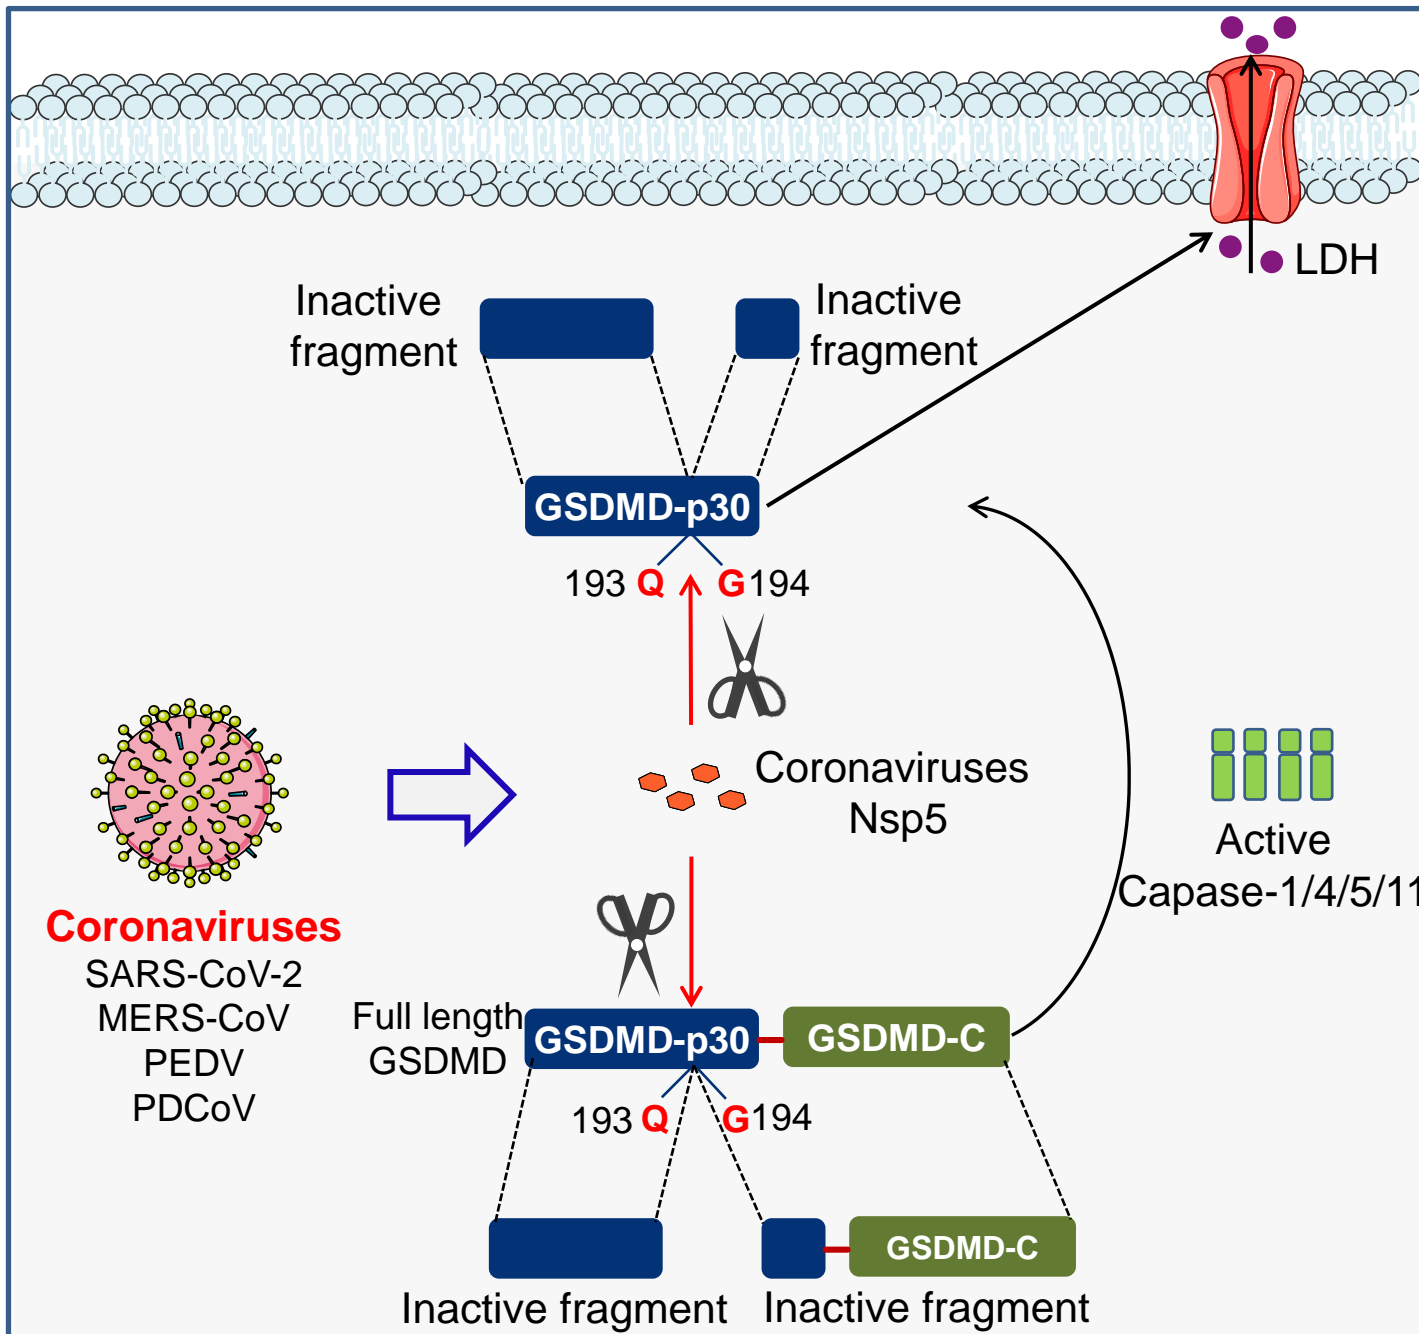

Source: https://biorxiv.org/content/10.1101/2021.02.23.432418v1.full.pdf
